# Supplementary material for: Omadacycline Efficacy against Enterococcus faecalis Isolated in China: In Vitro Activity, Heteroresistance, and Resistance Mechanisms
Source: PubMed Central journal article supplement (PMC7038293; doi:10.1128/aac.02097-19), 2020-02-21
Supplement: AAC.02097-19-s0001.pdf [file AAC.02097-19-s0001.pdf]

## Supplementary Electronic Materials

**Table S1.** The OMC and TGC MICs of the resistant subpopulations and OMC-induced resistant isolates after 10 passages on antibiotic-free medium.

| Isolate                                                         | MIC (mg/L) |            |             |          |            |             |
|-----------------------------------------------------------------|------------|------------|-------------|----------|------------|-------------|
|                                                                 | OMC        |            |             | TGC      |            |             |
|                                                                 | Parental   | 5 passages | 10 passages | Parental | 5 passages | 10 passages |
| <b>OMC resistant subpopulations of heteroresistant isolates</b> |            |            |             |          |            |             |
| EF16C361-RS <sup>a</sup>                                        | 4          | 2          | 0.5         | 2        | 1          | 0.5         |
| EF16C291-RS                                                     | 4          | 2          | 1           | 2        | 1          | 0.5         |
| EF16C3-RS                                                       | 2          | 1          | 0.5         | 2        | 1          | 0.25        |
| EF16C28-RS                                                      | 4          | 2          | 1           | 2        | 0.5        | 0.25        |
| EF16C350-RS                                                     | 4          | 2          | 1           | 2        | 1          | 0.5         |
| EF16C185-RS                                                     | 4          | 1          | 0.5         | 2        | 1          | 0.5         |
| <b>OMC-induced resistant isolates</b>                           |            |            |             |          |            |             |
| EF16C361-IR                                                     | 8          | 8          | 8           | 8        | 8          | 8           |
| EF16C291-IR2                                                    | 16         | 16         | 16          | 4        | 8          | 8           |
| EF16C3-IR2                                                      | 16         | 16         | 16          | 16       | 16         | 16          |
| EF16C28-IR                                                      | 32         | 32         | 32          | 16       | 16         | 16          |
| EF16C350-IR                                                     | 16         | 16         | 8           | 4        | 8          | 8           |
| EF16C185-IR                                                     | 8          | 8          | 8           | 4        | 4          | 4           |

<sup>a</sup>RS: OMC resistant subpopulations; IR: OMC-induced resistant isolates.

**Table S2.** Differentially expressed genes (DEGs) of EF16-O2 compared to EF16 by RNA-sequencing at middle-log phase.

| Gene id       | RNA-seq fold change <sup>a</sup><br>(EF16-O2/<br>EF16) | p-value <sup>b</sup> | Description or predicted function                                         |
|---------------|--------------------------------------------------------|----------------------|---------------------------------------------------------------------------|
| OG1RF_RS07070 | 124.67                                                 | 0.0032               | 2-oxo acid dehydrogenase subunit E2                                       |
| OG1RF_RS07080 | 119.88                                                 | 0.0048               | thiamine pyrophosphate-dependent dehydrogenase E1 component subunit alpha |
| OG1RF_RS03915 | 74.12                                                  | 0.0085               | pyruvate phosphate dikinase                                               |
| OG1RF_RS02315 | 72.01                                                  | <0.0001              | tagatose 1, 6-diphosphate aldolase                                        |
| OG1RF_RS08270 | 66.56                                                  | <0.0001              | glucosamine--fructose-6-phosphate aminotransferase                        |
| OG1RF_RS08610 | 52.24                                                  | 0.0002               | metal ABC transporter substrate-binding protein                           |
| OG1RF_RS02310 | 50.00                                                  | <0.0001              | PTS fructose transporter subunit IIA                                      |
| OG1RF_RS08275 | 49.16                                                  | <0.0001              | SIS domain-containing protein                                             |
| OG1RF_RS07770 | 48.69                                                  | 0.0001               | PTS system mannose/fructose/N-acetylgalactosamine-transporter subunit IIB |
| OG1RF_RS07085 | 46.51                                                  | 0.0128               | dihydrolipoyl dehydrogenase                                               |
| OG1RF_RS04895 | 45.76                                                  | <0.0001              | glycine/betaine/sarcosine/D-proline reductase family selenoprotein B      |
| OG1RF_RS07065 | 44.69                                                  | 0.0059               | PTS sugar transporter subunit IIC                                         |
| OG1RF_RS07755 | 42.62                                                  | <0.0001              | PTS fructose transporter subunit IIA                                      |
| OG1RF_RS13115 | 36.91                                                  | 0.0002               | oxaloacetate decarboxylase                                                |
| OG1RF_RS07095 | 36.64                                                  | <0.0001              | branched-chain phosphotransacylase                                        |
| OG1RF_RS02305 | 36.31                                                  | <0.0001              | PTS fructose transporter subunit IIC                                      |
| OG1RF_RS08280 | 34.39                                                  | <0.0001              | PTS mannose transporter subunit IID                                       |
| OG1RF_RS07765 | 33.34                                                  | <0.0001              | PTS sugar transporter subunit IIC                                         |
| OG1RF_RS13110 | 32.22                                                  | 0.0001               | NADP-dependent malic enzyme                                               |
| OG1RF_RS04885 | 31.93                                                  | 0.0007               | PTS sugar transporter subunit IIB                                         |
| OG1RF_RS07760 | 29.58                                                  | <0.0001              | PTS fructose transporter subunit IID                                      |
| OG1RF_RS07785 | 28.78                                                  | <0.0001              | tagatose-bisphosphate aldolase                                            |
| OG1RF_RS07800 | 28.71                                                  | <0.0001              | glycosyltransferase family 8 protein                                      |
| OG1RF_RS12075 | 28.49                                                  | <0.0001              | hypothetical protein                                                      |
| OG1RF_RS13105 | 28.14                                                  | 0.0005               | triphosphoribosyl-diphospho-CoA synthase CitG                             |
| OG1RF_RS07090 | 27.59                                                  | 0.0044               | butyrate kinase                                                           |
| OG1RF_RS13125 | 26.37                                                  | 0.0023               | citrate lyase subunit alpha                                               |
| OG1RF_RS08290 | 25.33                                                  | <0.0001              | PTS mannose/fructose/sorbose transporter subunit IIB                      |
| OG1RF_RS07805 | 24.66                                                  | <0.0001              | glycosyltransferase family 8 protein                                      |
| OG1RF_RS08285 | 24.06                                                  | <0.0001              | PTS sugar transporter subunit IIC                                         |
| OG1RF_RS07790 | 22.83                                                  | 0.0012               | tagatose-6-phosphate ketose                                               |
| OG1RF_RS13140 | 22.63                                                  | 0.0008               | [citrate (pro-3S)-lyase] ligase                                           |
| OG1RF_RS13130 | 22.29                                                  | 0.0035               | citrate (pro-3S)-lyase subunit beta                                       |
| OG1RF_RS13120 | 21.53                                                  | 0.0027               | citrate lyase holo-[acyl-carrier protein] synthase                        |
| OG1RF_RS07750 | 20.97                                                  | <0.0001              | hypothetical protein                                                      |
| OG1RF_RS08605 | 20.92                                                  | 0.0001               | metal ABC transporter permease                                            |
| OG1RF_RS13150 | 20.18                                                  | 0.0101               | sodium ion-translocating decarboxylase subunit beta                       |
| OG1RF_RS04890 | 19.98                                                  | <0.0001              | PTS system%2C cellobiose-specific IIC component                           |
| OG1RF_RS08265 | 18.76                                                  | 0.0001               | DUF2200 domain-containing protein                                         |
| OG1RF_RS07780 | 18.73                                                  | 0.0001               | tagatose-6-phosphate kinase                                               |
| OG1RF_RS07775 | 18.71                                                  | 0.0001               | beta-galactosidase                                                        |
| OG1RF_RS01400 | 18.51                                                  | <0.0001              | chitin-binding protein                                                    |
| OG1RF_RS12000 | 16.87                                                  | <0.0001              | biotin transporter BioY                                                   |
| OG1RF_RS04880 | 16.72                                                  | 0.0060               | N(4)-(beta-N-acetylglucosaminy)-L-asparaginase                            |
| OG1RF_RS08295 | 16.25                                                  | <0.0001              | PTS fructose transporter subunit IIA                                      |

|               |       |         |                                                                            |
|---------------|-------|---------|----------------------------------------------------------------------------|
| OG1RF_RS01395 | 14.93 | 0.0002  | chitinase                                                                  |
| OG1RF_RS05095 | 14.27 | <0.0001 | NADP-dependent malic enzyme                                                |
| OG1RF_RS00535 | 12.16 | <0.0001 | glycosyl hydrolase                                                         |
| OG1RF_RS11090 | 12.07 | <0.0001 | chitinase                                                                  |
| OG1RF_RS10900 | 10.89 | <0.0001 | cobalt ABC transporter permease                                            |
| OG1RF_RS12585 | 10.87 | <0.0001 | membrane protein                                                           |
| OG1RF_RS10015 | 10.78 | <0.0001 | YgeY family selenium metabolism-linked hydrolase                           |
| OG1RF_RS13580 | 10.57 | 0.0023  | hypothetical protein                                                       |
| OG1RF_RS06825 | 10.52 | 0.0002  | hypothetical protein                                                       |
| OG1RF_RS00365 | 10.48 | <0.0001 | Asp23/Gls24 family envelope stress response protein                        |
| OG1RF_RS04575 | 10.28 | <0.0001 | DUF378 domain-containing protein                                           |
| OG1RF_RS02300 | 10.15 | 0.0007  | 1-phosphofructokinase                                                      |
| OG1RF_RS00990 | 10.13 | 0.0005  | aldehyde dehydrogenase                                                     |
| OG1RF_RS10935 | 9.94  | <0.0001 | hydroxyethylthiazole kinase                                                |
| OG1RF_RS00370 | 9.89  | <0.0001 | GlsB/YeaQ/YmgE family stress response membrane protein                     |
| OG1RF_RS00515 | 9.88  | <0.0001 | YfcC family protein                                                        |
| OG1RF_RS07735 | 9.83  | <0.0001 | hypothetical protein                                                       |
| OG1RF_RS12005 | 9.83  | <0.0001 | signal peptidase I                                                         |
| OG1RF_RS10010 | 9.64  | <0.0001 | knotted carbamoyltransferase YgeW                                          |
| OG1RF_RS05100 | 9.61  | 0.0020  | L-malate permease                                                          |
| OG1RF_RS03925 | 9.54  | <0.0001 | phosphotransferase                                                         |
| OG1RF_RS00500 | 9.27  | <0.0001 | omithine carbamoyltransferase                                              |
| OG1RF_RS01715 | 9.16  | <0.0001 | gluconate 5-dehydrogenase                                                  |
| OG1RF_RS00355 | 9.08  | <0.0001 | DUF2273 domain-containing protein                                          |
| OG1RF_RS05935 | 8.83  | <0.0001 | dihydrolipoyl dehydrogenase                                                |
| OG1RF_RS10925 | 8.60  | <0.0001 | bifunctional hydroxymethylpyrimidine kinase/phosphomethylpyrimidine kinase |
| OG1RF_RS05925 | 8.60  | <0.0001 | alpha-ketoacid dehydrogenase subunit beta                                  |
| OG1RF_RS02395 | 8.49  | <0.0001 | WxL domain-containing protein                                              |
| OG1RF_RS12125 | 8.46  | <0.0001 | oligopeptide ABC transporter substrate-binding protein                     |
| OG1RF_RS08600 | 8.44  | <0.0001 | metal ABC transporter ATP-binding protein                                  |
| OG1RF_RS12295 | 8.37  | <0.0001 | PTS mannose/fructose/sorbose transporter subunit IIB                       |
| OG1RF_RS13065 | 8.17  | <0.0001 | PTS sorbitol transporter subunit IIC                                       |
| OG1RF_RS09925 | 8.04  | <0.0001 | pyruvate:ferredoxin (flavodoxin) oxidoreductase                            |
| OG1RF_RS10885 | 7.93  | <0.0001 | thiaminase II                                                              |
| OG1RF_RS05115 | 7.92  | <0.0001 | NADH peroxidase                                                            |
| OG1RF_RS00630 | 7.73  | <0.0001 | BMP family ABC transporter substrate-binding protein                       |
| OG1RF_RS05250 | 7.68  | 0.0079  | beta-glucosidase                                                           |
| OG1RF_RS10005 | 7.57  | <0.0001 | carbamate kinase                                                           |
| OG1RF_RS09120 | 7.56  | <0.0001 | myo-inosose-2 dehydratase                                                  |
| OG1RF_RS10000 | 7.52  | 0.0003  | RidA family protein                                                        |
| OG1RF_RS02130 | 7.51  | <0.0001 | hypothetical protein                                                       |
| OG1RF_RS00360 | 7.35  | <0.0001 | Asp23/Gls24 family envelope stress response protein                        |
| OG1RF_RS03960 | 7.34  | <0.0001 | 6-aminohexanoate hydrolase                                                 |
| OG1RF_RS02190 | 7.23  | <0.0001 | type II-A CRISPR-associated protein Csn2                                   |
| OG1RF_RS04780 | 7.21  | 0.0001  | aldo/keto reductase                                                        |
| OG1RF_RS05255 | 7.20  | <0.0001 | hypothetical protein                                                       |
| OG1RF_RS12290 | 7.07  | 0.0021  | PTS fructose transporter subunit IIA                                       |
| OG1RF_RS04875 | 7.00  | <0.0001 | peptidase M20                                                              |
| OG1RF_RS13055 | 6.91  | <0.0001 | PTS sorbitol transporter subunit IIA                                       |

|               |      |         |                                                                         |
|---------------|------|---------|-------------------------------------------------------------------------|
| OG1RF_RS01710 | 6.83 | <0.0001 | 5-keto-4-deoxyuronate isomerase                                         |
| OG1RF_RS13070 | 6.78 | <0.0001 | transcriptional regulator                                               |
| OG1RF_RS06150 | 6.74 | <0.0001 | molybdate ABC transporter permease subunit                              |
| OG1RF_RS00350 | 6.72 | <0.0001 | alkaline shock response membrane anchor protein AmaP                    |
| OG1RF_RS05245 | 6.69 | <0.0001 | endonuclease                                                            |
| OG1RF_RS06490 | 6.65 | <0.0001 | DUF871 domain-containing protein                                        |
| OG1RF_RS07730 | 6.61 | 0.0031  | DUF2188 domain-containing protein                                       |
| OG1RF_RS12590 | 6.60 | <0.0001 | ABC transporter permease                                                |
| OG1RF_RS01315 | 6.56 | <0.0001 | 6-phospho-beta-glucosidase                                              |
| OG1RF_RS13050 | 6.55 | <0.0001 | fructose-bisphosphate aldolase                                          |
| OG1RF_RS05930 | 6.48 | <0.0001 | dihydrolipoyllysine-residue acetyltransferase                           |
| OG1RF_RS12300 | 6.36 | 0.0059  | PTS mannose transporter subunit IID                                     |
| OG1RF_RS05130 | 6.24 | <0.0001 | acetolactate decarboxylase                                              |
| OG1RF_RS00495 | 6.24 | 0.0001  | arginine deiminase                                                      |
| OG1RF_RS10930 | 6.22 | 0.0022  | thiamine phosphate synthase                                             |
| OG1RF_RS12280 | 6.22 | <0.0001 | 4-hydroxy-2-oxoglutarate aldolase                                       |
| OG1RF_RS06795 | 6.13 | <0.0001 | deoxyribodipyrimidine photo-lyase                                       |
| OG1RF_RS13060 | 6.07 | 0.0003  | PTS protein%2C glucitol/sorbitol%2C IIBC component                      |
| OG1RF_RS05125 | 6.05 | <0.0001 | acetolactate synthase AlsS                                              |
| OG1RF_RS12695 | 6.03 | <0.0001 | DNA starvation/stationary phase protection protein                      |
| OG1RF_RS09960 | 6.01 | <0.0001 | sulfurtransferase-like selenium metabolism protein YedF                 |
| OG1RF_RS09995 | 5.93 | <0.0001 | purine permease                                                         |
| OG1RF_RS06000 | 5.93 | <0.0001 | hypothetical protein                                                    |
| OG1RF_RS12725 | 5.89 | <0.0001 | type II toxin-antitoxin system PemK/MazF family toxin                   |
| OG1RF_RS09130 | 5.89 | <0.0001 | gfo/Idh/MocA family oxidoreductase                                      |
| OG1RF_RS05960 | 5.78 | <0.0001 | dihydroxyacetone kinase subunit L                                       |
| OG1RF_RS05920 | 5.73 | <0.0001 | pyruvate dehydrogenase (acetyl-transferring) E1 component subunit alpha |
| OG1RF_RS06395 | 5.67 | 0.0119  | PTS fructose transporter subunit IIA                                    |
| OG1RF_RS06215 | 5.66 | <0.0001 | 6-phospho-beta-glucosidase                                              |
| OG1RF_RS13510 | 5.62 | <0.0001 | 6S RNA                                                                  |
| OG1RF_RS12285 | 5.59 | 0.0024  | mannonate dehydratase                                                   |
| OG1RF_RS04740 | 5.49 | 0.0011  | 3-dehydro-L-gulonate-6-phosphate decarboxylase UlaD                     |
| OG1RF_RS09080 | 5.40 | <0.0001 | sugar ABC transporter substrate-binding protein                         |
| OG1RF_RS11790 | 5.39 | 0.0001  | silent information regulator protein Sir2                               |
| OG1RF_RS01840 | 5.38 | <0.0001 | organic hydroperoxide resistance protein                                |
| OG1RF_RS06405 | 5.38 | 0.0001  | ribulose-phosphate 3-epimerase                                          |
| OG1RF_RS02175 | 5.36 | <0.0001 | type II CRISPR RNA-guided endonuclease Cas9                             |
| OG1RF_RS10460 | 5.34 | 0.0001  | competence protein ComA                                                 |
| OG1RF_RS12730 | 5.32 | <0.0001 | hypothetical protein                                                    |
| OG1RF_RS05230 | 5.27 | 0.0003  | hypothetical protein                                                    |
| OG1RF_RS06145 | 5.25 | <0.0001 | molybdate ABC transporter substrate-binding protein                     |
| OG1RF_RS03385 | 5.23 | <0.0001 | VOC family protein                                                      |
| OG1RF_RS10940 | 5.23 | <0.0001 | energy coupling factor transporter S component ThiW                     |
| OG1RF_RS09950 | 5.18 | <0.0001 | putative selenium-dependent hydroxylase accessory protein YqeC          |
| OG1RF_RS06865 | 5.18 | <0.0001 | formate C-acetyltransferase                                             |
| OG1RF_RS00540 | 5.18 | 0.0014  | reactive intermediate/imine deaminase                                   |
| OG1RF_RS04870 | 5.10 | <0.0001 | GntR family transcriptional regulator                                   |
| OG1RF_RS07130 | 5.07 | <0.0001 | carboxylesterase                                                        |
| OG1RF_RS07165 | 5.04 | <0.0001 | lipoprotein                                                             |

|               |      |         |                                                           |
|---------------|------|---------|-----------------------------------------------------------|
| OG1RF_RS11570 | 5.03 | 0.0071  | PTS fructose transporter subunit IID                      |
| OG1RF_RS02645 | 5.02 | <0.0001 | RNase adaptor protein RapZ                                |
| OG1RF_RS09110 | 4.99 | 0.0013  | PTS cellobiose transporter subunit IIC                    |
| OG1RF_RS01550 | 4.97 | <0.0001 | serine protease                                           |
| OG1RF_RS09135 | 4.92 | 0.0127  | methylmalonate-semialdehyde dehydrogenase (CoA acylating) |
| OG1RF_RS05280 | 4.89 | <0.0001 | oxidoreductase                                            |
| OG1RF_RS06740 | 4.87 | <0.0001 | NADH oxidase                                              |
| OG1RF_RS13415 | 4.84 | <0.0001 | transfer-messenger RNA                                    |
| OG1RF_RS02845 | 4.75 | <0.0001 | GlsB/YeaQ/YmgE family stress response membrane protein    |
| OG1RF_RS09055 | 4.74 | <0.0001 | hypothetical protein                                      |
| OG1RF_RS04745 | 4.73 | 0.0006  | L-ribulose-5-phosphate 3-epimerase                        |
| OG1RF_RS10590 | 4.69 | <0.0001 | hypothetical protein                                      |
| OG1RF_RS10895 | 4.69 | <0.0001 | ABC transporter ATP-binding protein                       |
| OG1RF_RS02225 | 4.65 | <0.0001 | N-acetyltransferase                                       |
| OG1RF_RS10890 | 4.65 | <0.0001 | cobalt ABC transporter permease                           |
| OG1RF_RS02950 | 4.61 | 0.0006  | hypothetical protein                                      |
| OG1RF_RS06115 | 4.60 | 0.0002  | molybdopterin molybdenumtransferase MoeA                  |
| OG1RF_RS09945 | 4.58 | 0.0005  | hypothetical protein                                      |
| OG1RF_RS12135 | 4.54 | 0.0004  | ABC transporter permease                                  |
| OG1RF_RS11715 | 4.53 | <0.0001 | PucR family transcriptional regulator                     |
| OG1RF_RS04560 | 4.49 | <0.0001 | isopeptide-forming domain-containing fimbrial protein     |
| OG1RF_RS02540 | 4.46 | <0.0001 | hypothetical protein                                      |
| OG1RF_RS11780 | 4.46 | <0.0001 | DinB family protein                                       |
| OG1RF_RS03870 | 4.40 | <0.0001 | DUF3284 domain-containing protein                         |
| OG1RF_RS06730 | 4.34 | 0.0001  | cysteine synthase A                                       |
| OG1RF_RS02210 | 4.28 | <0.0001 | glycine/betaine ABC transporter permease                  |
| OG1RF_RS10025 | 4.27 | 0.0013  | dihydropyrimidinase                                       |
| OG1RF_RS09975 | 4.27 | 0.0002  | molybdenum cofactor cytidyltransferase                    |
| OG1RF_RS05955 | 4.26 | <0.0001 | dihydroxyacetone kinase subunit DhaK                      |
| OG1RF_RS02135 | 4.25 | <0.0001 | hypothetical protein                                      |
| OG1RF_RS05865 | 4.21 | <0.0001 | sulfate ABC transporter ATP-binding protein               |
| OG1RF_RS03130 | 4.20 | 0.0002  | transcriptional regulator                                 |
| OG1RF_RS01890 | 4.19 | 0.0001  | superoxide dismutase [Fe]                                 |
| OG1RF_RS08120 | 4.19 | <0.0001 | N-acetyltransferase                                       |
| OG1RF_RS04645 | 4.18 | <0.0001 | lactate utilization protein C                             |
| OG1RF_RS04640 | 4.16 | <0.0001 | iron-sulfur cluster-binding protein                       |
| OG1RF_RS06450 | 4.16 | <0.0001 | type I glyceraldehyde-3-phosphate dehydrogenase           |
| OG1RF_RS12305 | 4.10 | 0.0032  | PTS sugar transporter subunit IIC                         |
| OG1RF_RS04400 | 4.09 | <0.0001 | universal stress protein                                  |
| OG1RF_RS07125 | 4.09 | <0.0001 | ring-cleaving dioxygenase                                 |
| OG1RF_RS05240 | 4.09 | 0.0010  | acetylxylan esterase                                      |
| OG1RF_RS11735 | 4.08 | 0.0129  | hypothetical protein                                      |
| OG1RF_RS06400 | 4.08 | 0.0008  | PTS Fru family%2C IIC component                           |
| OG1RF_RS07135 | 4.04 | 0.0001  | NADP-dependent oxidoreductase                             |
| OG1RF_RS11730 | 4.03 | 0.0039  | DUF1116 domain-containing protein                         |
| OG1RF_RS12130 | 4.02 | 0.0005  | ABC transporter permease                                  |
| OG1RF_RS02295 | 4.02 | 0.0009  | MurR/RpiR family transcriptional regulator                |
| OG1RF_RS12145 | 3.92 | <0.0001 | ABC transporter ATP-binding protein                       |
| OG1RF_RS09965 | 3.89 | 0.0003  | selenide%2C water dikinase SelD                           |

|               |      |         |                                                        |
|---------------|------|---------|--------------------------------------------------------|
| OG1RF_RS10310 | 3.86 | <0.0001 | DUF697 domain-containing protein                       |
| OG1RF_RS02205 | 3.84 | <0.0001 | ABC transporter ATP-binding protein                    |
| OG1RF_RS06860 | 3.84 | <0.0001 | pyruvate formate lyase-activating protein              |
| OG1RF_RS07115 | 3.83 | 0.0022  | NAD(P)-dependent oxidoreductase                        |
| OG1RF_RS02445 | 3.81 | <0.0001 | hypothetical protein                                   |
| OG1RF_RS01510 | 3.80 | 0.0036  | MFS transporter                                        |
| OG1RF_RS03160 | 3.79 | 0.0001  | aldo/keto reductase                                    |
| OG1RF_RS00320 | 3.76 | 0.0027  | N-acetylmannosamine-6-phosphate 2-epimerase            |
| OG1RF_RS12140 | 3.75 | <0.0001 | ABC transporter ATP-binding protein                    |
| OG1RF_RS06155 | 3.73 | 0.0009  | molybdenum ABC transporter ATP-binding protein         |
| OG1RF_RS13320 | 3.72 | <0.0001 | hypothetical protein                                   |
| OG1RF_RS00615 | 3.72 | 0.0001  | 2-deoxyribose-5-phosphate aldolase                     |
| OG1RF_RS08955 | 3.71 | 0.0025  | hypothetical protein                                   |
| OG1RF_RS08300 | 3.71 | <0.0001 | sigma-54-dependent transcriptional regulator           |
| OG1RF_RS12595 | 3.68 | <0.0001 | ABC transporter ATP-binding protein                    |
| OG1RF_RS09970 | 3.66 | 0.0002  | aminotransferase class V-fold PLP-dependent enzyme     |
| OG1RF_RS03955 | 3.65 | 0.0016  | excinuclease ABC subunit UvrA                          |
| OG1RF_RS03150 | 3.65 | <0.0001 | copper-translocating P-type ATPase                     |
| OG1RF_RS06110 | 3.65 | 0.0001  | formate dehydrogenase subunit alpha                    |
| OG1RF_RS13425 | 3.61 | <0.0001 | RNase P RNA component class B                          |
| OG1RF_RS04965 | 3.59 | 0.0006  | YtxH domain-containing protein                         |
| OG1RF_RS00475 | 3.57 | <0.0001 | serine--tRNA ligase                                    |
| OG1RF_RS04430 | 3.57 | 0.0005  | VOC family protein                                     |
| OG1RF_RS09115 | 3.55 | 0.0021  | solute:sodium symporter family transporter             |
| OG1RF_RS01705 | 3.51 | 0.0005  | sugar kinase                                           |
| OG1RF_RS10750 | 3.51 | <0.0001 | pyridine nucleotide-disulfide oxidoreductase           |
| OG1RF_RS07490 | 3.51 | <0.0001 | YtxH domain-containing protein                         |
| OG1RF_RS12900 | 3.51 | <0.0001 | ATP-dependent Clp protease ATP-binding subunit         |
| OG1RF_RS05310 | 3.49 | 0.0002  | hypothetical protein                                   |
| OG1RF_RS03510 | 3.47 | 0.0001  | phosphate acetyltransferase                            |
| OG1RF_RS01855 | 3.46 | 0.0093  | PTS mannose transporter subunit IID                    |
| OG1RF_RS04395 | 3.42 | <0.0001 | divalent metal cation transporter                      |
| OG1RF_RS13080 | 3.42 | 0.0019  | NAD(P)-dependent oxidoreductase                        |
| OG1RF_RS02630 | 3.41 | <0.0001 | excinuclease ABC subunit UvrB                          |
| OG1RF_RS12500 | 3.40 | 0.0101  | succinyl-diaminopimelate desuccinylase                 |
| OG1RF_RS01735 | 3.39 | 0.0032  | TRAP transporter large permease                        |
| OG1RF_RS04555 | 3.39 | <0.0001 | isopeptide-forming domain-containing fimbrial protein  |
| OG1RF_RS03900 | 3.37 | 0.0001  | hypothetical protein                                   |
| OG1RF_RS06880 | 3.37 | 0.0003  | CoA-binding protein                                    |
| OG1RF_RS00645 | 3.30 | 0.0022  | ABC transporter permease                               |
| OG1RF_RS04750 | 3.22 | 0.0029  | L-ribulose-5-phosphate 4-epimerase AraD                |
| OG1RF_RS05670 | 3.21 | <0.0001 | flotillin family protein                               |
| OG1RF_RS02125 | 3.21 | 0.0001  | YebC/PmpR family DNA-binding transcriptional regulator |
| OG1RF_RS10030 | 3.21 | 0.0002  | putative selenate reductase subunit YgfK               |
| OG1RF_RS06610 | 3.21 | <0.0001 | hypothetical protein                                   |
| OG1RF_RS10755 | 3.20 | 0.0001  | peroxiredoxin                                          |
| OG1RF_RS11805 | 3.20 | 0.0001  | serine protease                                        |
| OG1RF_RS07590 | 3.16 | 0.0001  | ribosomal subunit interface protein                    |
| OG1RF_RS08935 | 3.14 | 0.0001  | PH domain-containing protein                           |

|               |      |        |                                                                       |
|---------------|------|--------|-----------------------------------------------------------------------|
| OG1RF_RS08430 | 3.12 | 0.0001 | universal stress protein                                              |
| OG1RF_RS05950 | 3.11 | 0.0001 | PTS-dependent dihydroxyacetone kinase phosphotransferase subunit DhaM |
| OG1RF_RS10470 | 3.06 | 0.0001 | transcriptional regulator Spx                                         |
| OG1RF_RS08420 | 3.06 | 0.0002 | hypothetical protein                                                  |
| OG1RF_RS06520 | 3.03 | 0.0001 | ECF transporter S component                                           |
| OG1RF_RS02365 | 3.02 | 0.0001 | ATP-dependent Clp protease ATP-binding subunit                        |
| OG1RF_RS10620 | 3.02 | 0.0008 | beta-galactosidase subunit alpha                                      |
| OG1RF_RS00345 | 3.02 | 0.0001 | KR domain-containing protein                                          |
| OG1RF_RS09575 | 3.01 | 0.0018 | ChbG/HpnK family deacetylase                                          |
| OG1RF_RS00670 | 3.00 | 0.0004 | phosphopentomutase                                                    |
| OG1RF_RS04790 | 2.99 | 0.0001 | lactoylglutathione lyase                                              |
| OG1RF_RS00680 | 2.96 | 0.0002 | purine-nucleoside phosphorylase                                       |
| OG1RF_RS10450 | 2.93 | 0.0002 | DsbA family protein                                                   |
| OG1RF_RS05275 | 2.92 | 0.0013 | glycoside hydrolase family I protein                                  |
| OG1RF_RS03805 | 2.90 | 0.0001 | cell division protein DivIVA                                          |
| OG1RF_RS05945 | 2.88 | 0.0004 | glycerol dehydrogenase                                                |
| OG1RF_RS06715 | 2.87 | 0.0001 | transketolase                                                         |
| OG1RF_RS02220 | 2.87 | 0.0002 | phosphoglucomutase                                                    |
| OG1RF_RS09175 | 2.86 | 0.0002 | chaperone protein ClpB                                                |
| OG1RF_RS10220 | 2.83 | 0.0003 | N-acetyltransferase                                                   |
| OG1RF_RS04720 | 2.83 | 0.0106 | L-ascorbate 6-phosphate lactonase                                     |
| OG1RF_RS06185 | 2.83 | 0.0002 | thioredoxin                                                           |
| OG1RF_RS02665 | 2.82 | 0.0002 | thioredoxin                                                           |
| OG1RF_RS07395 | 2.82 | 0.0021 | formate--tetrahydrofolate ligase                                      |
| OG1RF_RS00610 | 2.81 | 0.0003 | pyrimidine-nucleoside phosphorylase                                   |
| OG1RF_RS05290 | 2.81 | 0.0003 | iron-sulfur cluster biosynthesis family protein                       |
| OG1RF_RS08090 | 2.79 | 0.0006 | ROK family protein                                                    |
| OG1RF_RS12600 | 2.78 | 0.0021 | OsmC family peroxiredoxin                                             |
| OG1RF_RS10660 | 2.77 | 0.0110 | ABC-F type ribosomal protection protein Lsa(A)                        |
| OG1RF_RS11655 | 2.76 | 0.0004 | PucR family transcriptional regulator                                 |
| OG1RF_RS06330 | 2.76 | 0.0004 | alpha/beta hydrolase                                                  |
| OG1RF_RS05385 | 2.76 | 0.0002 | ATPase P                                                              |
| OG1RF_RS01465 | 2.74 | 0.0088 | hypothetical protein                                                  |
| OG1RF_RS03450 | 2.74 | 0.0120 | hypothetical protein                                                  |
| OG1RF_RS06140 | 2.72 | 0.0117 | molybdenum cofactor biosynthesis protein MoaB                         |
| OG1RF_RS12575 | 2.71 | 0.0007 | DNA-binding response regulator                                        |
| OG1RF_RS01370 | 2.71 | 0.0004 | aminopeptidase C                                                      |
| OG1RF_RS05260 | 2.70 | 0.0010 | LacI family transcriptional regulator                                 |
| OG1RF_RS00635 | 2.70 | 0.0006 | ABC transporter ATP-binding protein                                   |
| OG1RF_RS09930 | 2.69 | 0.0015 | glutamate synthase (NADPH)%2C homotetrameric                          |
| OG1RF_RS00590 | 2.69 | 0.0037 | esterase                                                              |
| OG1RF_RS01880 | 2.67 | 0.0026 | PTS fructose transporter subunit IIA                                  |
| OG1RF_RS10965 | 2.65 | 0.0006 | DUF3042 domain-containing protein                                     |
| OG1RF_RS00675 | 2.64 | 0.0007 | purine-nucleoside phosphorylase                                       |
| OG1RF_RS04635 | 2.63 | 0.0011 | (Fe-S)-binding protein                                                |
| OG1RF_RS02995 | 2.63 | 0.0035 | sugar kinase                                                          |
| OG1RF_RS02320 | 2.63 | 0.0005 | DUF402 domain-containing protein                                      |
| OG1RF_RS09345 | 2.63 | 0.0006 | Fe-S cluster assembly protein SufB                                    |
| OG1RF_RS03255 | 2.63 | 0.0006 | preprotein translocase subunit YajC                                   |

|               |      |        |                                                                       |
|---------------|------|--------|-----------------------------------------------------------------------|
| OG1RF_RS03120 | 2.63 | 0.0027 | glyoxalase                                                            |
| OG1RF_RS07400 | 2.62 | 0.0046 | cold shock domain-containing protein                                  |
| OG1RF_RS11485 | 2.62 | 0.0006 | ribose transporter RbsU                                               |
| OG1RF_RS11700 | 2.62 | 0.0009 | linear amide C-N hydrolase                                            |
| OG1RF_RS04715 | 2.61 | 0.0015 | DeoR/GlpR transcriptional regulator                                   |
| OG1RF_RS01350 | 2.61 | 0.0069 | copper-translocating P-type ATPase                                    |
| OG1RF_RS02170 | 2.60 | 0.0023 | hypothetical protein                                                  |
| OG1RF_RS02930 | 2.55 | 0.0015 | gfo/Idh/MocA family oxidoreductase                                    |
| OG1RF_RS09550 | 2.53 | 0.0044 | permease                                                              |
| OG1RF_RS02525 | 2.49 | 0.0017 | deoxynucleoside kinase                                                |
| OG1RF_RS05850 | 2.48 | 0.0010 | thioredoxin-disulfide reductase                                       |
| OG1RF_RS11300 | 2.48 | 0.0013 | ABC transporter substrate-binding protein                             |
| OG1RF_RS03780 | 2.47 | 0.0011 | cell division protein FtsZ                                            |
| OG1RF_RS00465 | 2.43 | 0.0037 | L-serine ammonia-lyase%2C iron-sulfur-dependent%2C subunit beta       |
| OG1RF_RS02650 | 2.42 | 0.0015 | YvcK family protein                                                   |
| OG1RF_RS05705 | 2.41 | 0.0018 | GntR family transcriptional regulator                                 |
| OG1RF_RS06555 | 2.40 | 0.0019 | 30S ribosomal protein S1                                              |
| OG1RF_RS06465 | 2.39 | 0.0036 | PTS sugar transporter subunit IIC                                     |
| OG1RF_RS06565 | 2.38 | 0.0022 | HU family DNA-binding protein                                         |
| OG1RF_RS11290 | 2.38 | 0.0026 | 2-hydroxyacid dehydrogenase                                           |
| OG1RF_RS11330 | 2.37 | 0.0020 | iron-sulfur cluster biosynthesis protein                              |
| OG1RF_RS03165 | 2.35 | 0.0024 | DNA polymerase I                                                      |
| OG1RF_RS03225 | 2.35 | 0.0041 | hypothetical protein                                                  |
| OG1RF_RS11595 | 2.34 | 0.0028 | histidine phosphatase family protein                                  |
| OG1RF_RS01940 | 2.34 | 0.0027 | NrdH-redoxin                                                          |
| OG1RF_RS00620 | 2.34 | 0.0047 | cytidine deaminase                                                    |
| OG1RF_RS02670 | 2.33 | 0.0026 | ATP-dependent Clp protease proteolytic subunit                        |
| OG1RF_RS01970 | 2.33 | 0.0030 | glyoxalase/bleomycin resistance/dioxygenase family protein            |
| OG1RF_RS11910 | 2.32 | 0.0033 | hypothetical protein                                                  |
| OG1RF_RS09580 | 2.32 | 0.0056 | DUF47 domain-containing protein                                       |
| OG1RF_RS02565 | 2.31 | 0.0029 | rhodanese domain-containing protein                                   |
| OG1RF_RS03190 | 2.31 | 0.0029 | primosomal protein DnaI                                               |
| OG1RF_RS00470 | 2.30 | 0.0043 | L-serine ammonia-lyase%2C iron-sulfur-dependent%2C subunit alpha      |
| OG1RF_RS09685 | 2.29 | 0.0033 | inositol monophosphatase family protein                               |
| OG1RF_RS11210 | 2.29 | 0.0034 | NAD(P)-dependent oxidoreductase                                       |
| OG1RF_RS13340 | 2.29 | 0.0090 | hypothetical protein                                                  |
| OG1RF_RS06125 | 2.28 | 0.0107 | GTP 3%2C8-cyclase MoaA                                                |
| OG1RF_RS04665 | 2.27 | 0.0033 | transcriptional regulator                                             |
| OG1RF_RS05640 | 2.27 | 0.0037 | N-acetylglucosamine-6-phosphate deacetylase                           |
| OG1RF_RS10225 | 2.27 | 0.0042 | hypothetical protein                                                  |
| OG1RF_RS12260 | 2.27 | 0.0036 | hypothetical protein                                                  |
| OG1RF_RS00705 | 2.27 | 0.0036 | NADH-dependent alcohol dehydrogenase                                  |
| OG1RF_RS00065 | 2.24 | 0.0046 | 50S ribosomal protein L9                                              |
| OG1RF_RS08435 | 2.24 | 0.0038 | acetate kinase                                                        |
| OG1RF_RS04040 | 2.23 | 0.0039 | phosphogluconate dehydrogenase (NADP(+)-dependent%2C decarboxylating) |
| OG1RF_RS07530 | 2.22 | 0.0049 | PspC domain-containing protein                                        |
| OG1RF_RS11915 | 2.21 | 0.0076 | hypothetical protein                                                  |
| OG1RF_RS09230 | 2.20 | 0.0060 | gfo/Idh/MocA family oxidoreductase                                    |
| OG1RF_RS12095 | 2.20 | 0.0054 | glyoxalase                                                            |



|               |      |        |                                                                    |
|---------------|------|--------|--------------------------------------------------------------------|
| OG1RF_RS07260 | 2.19 | 0.0056 | NAD(P)H-dependent oxidoreductase                                   |
| OG1RF_RS06070 | 2.18 | 0.0052 | peptidase T                                                        |
| OG1RF_RS12560 | 2.17 | 0.0098 | cysteine hydrolase                                                 |
| OG1RF_RS10825 | 2.17 | 0.0130 | anaerobic ribonucleoside-triphosphate reductase activating protein |
| OG1RF_RS07525 | 2.17 | 0.0059 | phage holin family protein                                         |
| OG1RF_RS03975 | 2.17 | 0.0089 | nucleoside-diphosphate kinase                                      |
| OG1RF_RS09360 | 2.16 | 0.0060 | Fe-S cluster assembly protein SufD                                 |
| OG1RF_RS04550 | 2.16 | 0.0051 | VWA domain-containing protein                                      |
| OG1RF_RS06210 | 2.16 | 0.0116 | LacI family transcriptional regulator                              |
| OG1RF_RS06575 | 2.16 | 0.0059 | tetratricopeptide repeat protein                                   |
| OG1RF_RS07705 | 2.15 | 0.0067 | membrane protein                                                   |
| OG1RF_RS01275 | 2.14 | 0.0054 | beta-hydroxyacyl-ACP dehydratase                                   |
| OG1RF_RS04710 | 2.13 | 0.0073 | metallophosphoesterase                                             |
| OG1RF_RS05270 | 2.13 | 0.0085 | GntR family transcriptional regulator                              |
| OG1RF_RS12315 | 2.13 | 0.0109 | 2-hydroxyacid dehydrogenase                                        |
| OG1RF_RS02655 | 2.13 | 0.0067 | sporulation regulator WhiA                                         |
| OG1RF_RS09500 | 2.12 | 0.0069 | phospho-sugar mutase                                               |
| OG1RF_RS02215 | 2.11 | 0.0084 | arginine repressor                                                 |
| OG1RF_RS02065 | 2.11 | 0.0075 | peptidase M48                                                      |
| OG1RF_RS02115 | 2.10 | 0.0072 | M3B subfamily peptidase                                            |
| OG1RF_RS06580 | 2.10 | 0.0087 | hypothetical protein                                               |
| OG1RF_RS05665 | 2.09 | 0.0096 | hypothetical protein                                               |
| OG1RF_RS12470 | 2.09 | 0.0110 | damage-inducible protein A                                         |
| OG1RF_RS08535 | 2.08 | 0.0080 | cytochrome d ubiquinol oxidase subunit II                          |
| OG1RF_RS12380 | 2.08 | 0.0069 | insulinase family protein                                          |
| OG1RF_RS02660 | 2.08 | 0.0089 | PEP phosphonmutase                                                 |
| OG1RF_RS02000 | 2.08 | 0.0093 | hypothetical protein                                               |
| OG1RF_RS10975 | 2.06 | 0.0135 | DUF488 domain-containing protein                                   |
| OG1RF_RS01470 | 2.04 | 0.0141 | deaminase                                                          |
| OG1RF_RS07540 | 2.04 | 0.0098 | phosphate transport system regulatory protein PhoU                 |
| OG1RF_RS00750 | 2.04 | 0.0138 | class I SAM-dependent methyltransferase                            |
| OG1RF_RS11370 | 2.04 | 0.0107 | UDP-N-acetylglucosamine 2-epimerase (non-hydrolyzing)              |
| OG1RF_RS10195 | 2.04 | 0.0124 | SsrA-binding protein                                               |
| OG1RF_RS09780 | 2.04 | 0.0117 | hypothetical protein                                               |
| OG1RF_RS08500 | 2.03 | 0.0127 | GntR family transcriptional regulator                              |
| OG1RF_RS03100 | 2.02 | 0.0114 | ABC transporter permease                                           |
| OG1RF_RS03835 | 2.01 | 0.0131 | gfo/Idh/MocA family oxidoreductase                                 |
| OG1RF_RS04975 | 0.51 | 0.0139 | S-ribosylhomocysteine lyase                                        |
| OG1RF_RS03140 | 0.50 | 0.0139 | potassium transporter Kup                                          |
| OG1RF_RS00585 | 0.50 | 0.0125 | type I pantothenate kinase                                         |
| OG1RF_RS12815 | 0.50 | 0.0132 | geranylgeranyl pyrophosphate synthase                              |
| OG1RF_RS06850 | 0.49 | 0.0141 | DUF1803 domain-containing protein                                  |
| OG1RF_RS12230 | 0.49 | 0.0137 | methionyl-tRNA formyltransferase                                   |
| OG1RF_RS00925 | 0.49 | 0.0141 | energy-coupling factor transporter transmembrane protein EcFT      |
| OG1RF_RS07580 | 0.49 | 0.0135 | peptide chain release factor 2                                     |
| OG1RF_RS00120 | 0.49 | 0.0133 | membrane protein                                                   |
| OG1RF_RS10175 | 0.49 | 0.0114 | ATP synthase subunit B                                             |
| OG1RF_RS02290 | 0.48 | 0.0130 | tRNA (guanosine(46)-N7)-methyltransferase TrmB                     |
| OG1RF_RS07100 | 0.48 | 0.0121 | YdcF family protein                                                |

|               |      |        |                                                                                                      |
|---------------|------|--------|------------------------------------------------------------------------------------------------------|
| OG1RF_RS08820 | 0.48 | 0.0101 | hypothetical protein                                                                                 |
| OG1RF_RS06630 | 0.48 | 0.0143 | chorismate synthase                                                                                  |
| OG1RF_RS09810 | 0.47 | 0.0130 | methionine ABC transporter ATP-binding protein                                                       |
| OG1RF_RS10410 | 0.47 | 0.0083 | tRNA<br>(uridine(34)/cytosine(34)/5-carboxymethylaminomethyluridine(34)-2'-O)-methyltransferase TrmL |
| OG1RF_RS01645 | 0.47 | 0.0112 | FAD-binding oxidoreductase                                                                           |
| OG1RF_RS10785 | 0.47 | 0.0092 | D-alanyl-lipoteichoic acid biosynthesis protein DltD                                                 |
| OG1RF_RS10415 | 0.47 | 0.0139 | methyltransferase domain-containing protein                                                          |
| OG1RF_RS10060 | 0.47 | 0.0066 | inosine-uridine preferring nucleoside hydrolase                                                      |
| OG1RF_RS10155 | 0.47 | 0.0076 | ATP synthase subunit beta                                                                            |
| OG1RF_RS00720 | 0.47 | 0.0090 | ribose-5-phosphate isomerase                                                                         |
| OG1RF_RS00075 | 0.47 | 0.0080 | adenylosuccinate synthetase                                                                          |
| OG1RF_RS10120 | 0.46 | 0.0065 | FMN-dependent NADH-azoreductase                                                                      |
| OG1RF_RS08970 | 0.46 | 0.0077 | nucleoid-associated protein                                                                          |
| OG1RF_RS01055 | 0.46 | 0.0086 | tRNA dihydrouridine synthase DusB                                                                    |
| OG1RF_RS00895 | 0.46 | 0.0133 | 50S ribosomal protein L17                                                                            |
| OG1RF_RS08760 | 0.46 | 0.0073 | epimerase                                                                                            |
| OG1RF_RS01560 | 0.46 | 0.0059 | AI-2E family transporter                                                                             |
| OG1RF_RS01035 | 0.46 | 0.0105 | tRNA lysidine(34) synthetase TisS                                                                    |
| OG1RF_RS03035 | 0.46 | 0.0085 | alanine racemase                                                                                     |
| OG1RF_RS13015 | 0.46 | 0.0100 | DUF951 domain-containing protein                                                                     |
| OG1RF_RS10910 | 0.46 | 0.0087 | MFS transporter                                                                                      |
| OG1RF_RS01780 | 0.46 | 0.0058 | peptide MFS transporter                                                                              |
| OG1RF_RS11345 | 0.46 | 0.0076 | sensor histidine kinase                                                                              |
| OG1RF_RS03320 | 0.45 | 0.0053 | ABC transporter ATP-binding protein                                                                  |
| OG1RF_RS11255 | 0.45 | 0.0065 | hypothetical protein                                                                                 |
| OG1RF_RS11350 | 0.45 | 0.0074 | membrane protein                                                                                     |
| OG1RF_RS10870 | 0.45 | 0.0058 | thymidylate kinase                                                                                   |
| OG1RF_RS01975 | 0.45 | 0.0052 | cardiolipin synthase                                                                                 |
| OG1RF_RS10445 | 0.45 | 0.0072 | CYTH domain-containing protein                                                                       |
| OG1RF_RS09830 | 0.45 | 0.0063 | FtsW/RodA/SpoVE family cell cycle protein                                                            |
| OG1RF_RS10835 | 0.45 | 0.0076 | iron export ABC transporter permease subunit FetB                                                    |
| OG1RF_RS06035 | 0.45 | 0.0065 | hypothetical protein                                                                                 |
| OG1RF_RS00180 | 0.45 | 0.0129 | YafY family transcriptional regulator                                                                |
| OG1RF_RS11220 | 0.44 | 0.0080 | glycosyl transferase family 1                                                                        |
| OG1RF_RS06645 | 0.44 | 0.0078 | shikimate kinase                                                                                     |
| OG1RF_RS01885 | 0.44 | 0.0052 | DUF1189 domain-containing protein                                                                    |
| OG1RF_RS05010 | 0.44 | 0.0045 | TIGR01906 family membrane protein                                                                    |
| OG1RF_RS09190 | 0.44 | 0.0055 | 5-(carboxyamino)imidazole ribonucleotide synthase                                                    |
| OG1RF_RS08665 | 0.44 | 0.0049 | hypothetical protein                                                                                 |
| OG1RF_RS01600 | 0.44 | 0.0059 | nitroreductase family protein                                                                        |
| OG1RF_RS12225 | 0.44 | 0.0038 | 16S rRNA (cytosine(967)-C(5))-methyltransferase RsmB                                                 |
| OG1RF_RS11450 | 0.43 | 0.0038 | tRNA 4-thiouridine(8) synthase ThiI                                                                  |
| OG1RF_RS11430 | 0.43 | 0.0076 | TVP38/TMEM64 family protein                                                                          |
| OG1RF_RS05630 | 0.43 | 0.0054 | hypothetical protein                                                                                 |
| OG1RF_RS12800 | 0.43 | 0.0024 | NAD(P)/FAD-dependent oxidoreductase                                                                  |
| OG1RF_RS02700 | 0.43 | 0.0038 | glycerophosphoryl diester phosphodiesterase                                                          |
| OG1RF_RS03735 | 0.43 | 0.0037 | division/cell wall cluster transcriptional repressor MraZ                                            |
| OG1RF_RS11215 | 0.43 | 0.0035 | glycosyltransferase family 4 protein                                                                 |
| OG1RF_RS04815 | 0.42 | 0.0028 | DUF1934 domain-containing protein                                                                    |

|               |      |        |                                                                              |
|---------------|------|--------|------------------------------------------------------------------------------|
| OG1RF_RS10650 | 0.42 | 0.0081 | 50S ribosomal protein L1                                                     |
| OG1RF_RS04820 | 0.42 | 0.0018 | DNA-directed RNA polymerase subunit delta                                    |
| OG1RF_RS05525 | 0.42 | 0.0025 | riboflavin biosynthesis protein RibF                                         |
| OG1RF_RS06635 | 0.42 | 0.0143 | prephenate dehydrogenase                                                     |
| OG1RF_RS06415 | 0.41 | 0.0114 | lysozyme family protein                                                      |
| OG1RF_RS00910 | 0.41 | 0.0098 | amidohydrolase                                                               |
| OG1RF_RS03645 | 0.41 | 0.0111 | ribosomal-processing cysteine protease Prp                                   |
| OG1RF_RS11280 | 0.41 | 0.0025 | ferredoxin--NADP(+) reductase                                                |
| OG1RF_RS07630 | 0.41 | 0.0038 | 3-oxoacyl-ACP reductase                                                      |
| OG1RF_RS03315 | 0.41 | 0.0017 | ABC transporter permease                                                     |
| OG1RF_RS07450 | 0.41 | 0.0068 | DUF1801 domain-containing protein                                            |
| OG1RF_RS00745 | 0.41 | 0.0092 | bifunctional hydroxymethylpyrimidine kinase/phosphomethylpyrimidine kinase   |
| OG1RF_RS09505 | 0.40 | 0.0037 | PLP-dependent aminotransferase family protein                                |
| OG1RF_RS10400 | 0.40 | 0.0015 | ATP-dependent RecD-like DNA helicase                                         |
| OG1RF_RS09265 | 0.40 | 0.0014 | PolC-type DNA polymerase III                                                 |
| OG1RF_RS03275 | 0.40 | 0.0044 | phosphomevalonate kinase                                                     |
| OG1RF_RS09900 | 0.40 | 0.0023 | peptide chain release factor N(5)-glutamine methyltransferase                |
| OG1RF_RS12660 | 0.40 | 0.0115 | PTS mannose transporter subunit IID                                          |
| OG1RF_RS10075 | 0.40 | 0.0024 | serine hydrolase                                                             |
| OG1RF_RS13175 | 0.40 | 0.0029 | DNA-binding response regulator                                               |
| OG1RF_RS09795 | 0.40 | 0.0021 | isoprenyl transferase                                                        |
| OG1RF_RS02785 | 0.40 | 0.0017 | TIGR01212 family radical SAM protein                                         |
| OG1RF_RS03370 | 0.39 | 0.0085 | SulP family inorganic anion transporter                                      |
| OG1RF_RS11025 | 0.39 | 0.0076 | FUSC family protein                                                          |
| OG1RF_RS12340 | 0.39 | 0.0020 | CDP-diacylglycerol--glycerol-3-phosphate 3-phosphatidyltransferase           |
| OG1RF_RS06350 | 0.39 | 0.0009 | metal-sulfur cluster assembly factor                                         |
| OG1RF_RS11385 | 0.39 | 0.0054 | ABC transporter ATP-binding protein                                          |
| OG1RF_RS08885 | 0.39 | 0.0020 | glycosyltransferase family 2 protein                                         |
| OG1RF_RS05200 | 0.39 | 0.0016 | hypothetical protein                                                         |
| OG1RF_RS02825 | 0.39 | 0.0118 | amino acid ABC superfamily ATP-binding cassette transporter -binding protein |
| OG1RF_RS06790 | 0.39 | 0.0037 | catalase                                                                     |
| OG1RF_RS04945 | 0.39 | 0.0007 | 50S ribosomal protein L31 type B                                             |
| OG1RF_RS12090 | 0.39 | 0.0013 | YitT family protein                                                          |
| OG1RF_RS01040 | 0.38 | 0.0012 | hypoxanthine-guanine phosphoribosyltransferase                               |
| OG1RF_RS10760 | 0.38 | 0.0007 | O-methyltransferase                                                          |
| OG1RF_RS13000 | 0.38 | 0.0012 | membrane protein                                                             |
| OG1RF_RS09640 | 0.38 | 0.0032 | 16S rRNA (guanine(966)-N(2))-methyltransferase RsmD                          |
| OG1RF_RS00940 | 0.38 | 0.0006 | branched-chain amino acid transport system II carrier protein                |
| OG1RF_RS04050 | 0.38 | 0.0007 | sensor histidine kinase                                                      |
| OG1RF_RS08105 | 0.38 | 0.0010 | GTP-binding protein                                                          |
| OG1RF_RS01565 | 0.37 | 0.0014 | membrane protein                                                             |
| OG1RF_RS12665 | 0.37 | 0.0021 | PRD domain-containing protein                                                |
| OG1RF_RS02780 | 0.37 | 0.0009 | rRNA methyltransferase                                                       |
| OG1RF_RS02120 | 0.37 | 0.0099 | membrane protein                                                             |
| OG1RF_RS05070 | 0.36 | 0.0123 | threonine/serine exporter                                                    |
| OG1RF_RS09675 | 0.36 | 0.0012 | DNA helicase RecQ                                                            |
| OG1RF_RS06725 | 0.36 | 0.0006 | N-acetylmuramoyl-L-alanine amidase                                           |
| OG1RF_RS07050 | 0.36 | 0.0038 | ribosome biogenesis GTPase YlqF                                              |
| OG1RF_RS09570 | 0.36 | 0.0004 | undecaprenyl-diphosphatase                                                   |

|               |      |         |                                                                   |
|---------------|------|---------|-------------------------------------------------------------------|
| OG1RF_RS09695 | 0.36 | 0.0063  | voltage-gated chloride channel protein                            |
| OG1RF_RS10595 | 0.36 | 0.0055  | LytR family transcriptional regulator                             |
| OG1RF_RS09740 | 0.36 | 0.0027  | ribosomal-protein-alanine N-acetyltransferase                     |
| OG1RF_RS03230 | 0.36 | 0.0102  | pyridoxal phosphate-dependent aminotransferase                    |
| OG1RF_RS03280 | 0.36 | 0.0012  | diphosphomevalonate decarboxylase                                 |
| OG1RF_RS10270 | 0.36 | 0.0004  | co-chaperone GroES                                                |
| OG1RF_RS04600 | 0.36 | 0.0013  | ABC transporter ATP-binding protein                               |
| OG1RF_RS09405 | 0.36 | 0.0002  | cytochrome oxidase biogenesis protein OxaA                        |
| OG1RF_RS12810 | 0.35 | 0.0025  | heptaprenyl diphosphate synthase subunit I                        |
| OG1RF_RS11055 | 0.35 | 0.0003  | tautomerase                                                       |
| OG1RF_RS10800 | 0.35 | 0.0004  | D-alanine--poly(phosphoribitol) ligase subunit 1                  |
| OG1RF_RS02110 | 0.35 | 0.0050  | MATE family efflux transporter                                    |
| OG1RF_RS11920 | 0.35 | 0.0011  | class A sortase                                                   |
| OG1RF_RS04535 | 0.35 | 0.0008  | thioredoxin                                                       |
| OG1RF_RS06550 | 0.34 | 0.0003  | cytidylate kinase                                                 |
| OG1RF_RS02620 | 0.34 | 0.0002  | amino acid ABC transporter ATP-binding protein                    |
| OG1RF_RS08890 | 0.34 | 0.0010  | glycosyl transferase family 2                                     |
| OG1RF_RS11425 | 0.34 | 0.0003  | hypothetical protein                                              |
| OG1RF_RS08065 | 0.34 | 0.0002  | enoyl-CoA hydratase                                               |
| OG1RF_RS01445 | 0.34 | 0.0074  | sensor histidine kinase                                           |
| OG1RF_RS08810 | 0.34 | 0.0009  | glycosyl transferase family 2                                     |
| OG1RF_RS07280 | 0.34 | 0.0048  | DUF523 domain-containing protein                                  |
| OG1RF_RS06535 | 0.34 | 0.0014  | hypothetical protein                                              |
| OG1RF_RS06505 | 0.33 | 0.0003  | segregation/condensation protein A                                |
| OG1RF_RS08520 | 0.33 | 0.0004  | polyprenyl synthetase family protein                              |
| OG1RF_RS12390 | 0.33 | 0.0001  | large conductance mechanosensitive channel protein MscL           |
| OG1RF_RS12605 | 0.33 | 0.0025  | 30S ribosomal protein S14                                         |
| OG1RF_RS09465 | 0.33 | 0.0006  | transcriptional repressor                                         |
| OG1RF_RS02510 | 0.33 | 0.0002  | amidase                                                           |
| OG1RF_RS03270 | 0.33 | 0.0041  | type 2 isopentenyl-diphosphate Delta-isomerase                    |
| OG1RF_RS09680 | 0.33 | 0.0058  | translational GTPase TypA                                         |
| OG1RF_RS00410 | 0.33 | 0.0090  | hypothetical protein                                              |
| OG1RF_RS02745 | 0.32 | 0.0024  | TetR family transcriptional regulator                             |
| OG1RF_RS10330 | 0.32 | 0.0001  | GntP family permease                                              |
| OG1RF_RS09565 | 0.32 | 0.0002  | PTS system protein%2C IIA component                               |
| OG1RF_RS11520 | 0.31 | <0.0001 | PRD domain-containing protein                                     |
| OG1RF_RS00455 | 0.31 | 0.0001  | hypothetical protein                                              |
| OG1RF_RS10655 | 0.31 | 0.0026  | 50S ribosomal protein L11                                         |
| OG1RF_RS04785 | 0.31 | 0.0002  | gamma-glutamyl-gamma-aminobutyrate hydrolase                      |
| OG1RF_RS12690 | 0.31 | <0.0001 | 50S ribosomal protein L13                                         |
| OG1RF_RS00255 | 0.31 | 0.0001  | 4-diphosphocytidyl-2C-methyl-D-erythritol kinase                  |
| OG1RF_RS02330 | 0.31 | 0.0001  | AI-2E family transporter                                          |
| OG1RF_RS13085 | 0.30 | <0.0001 | tRNA uridine-5-carboxymethylaminomethyl(34) synthesis enzyme MnmG |
| OG1RF_RS08240 | 0.30 | 0.0001  | Bcr/CflA family drug resistance efflux transporter                |
| OG1RF_RS08845 | 0.30 | 0.0003  | ABC transporter permease                                          |
| OG1RF_RS12490 | 0.30 | 0.0121  | YccF domain-containing protein                                    |
| OG1RF_RS03310 | 0.30 | <0.0001 | ABC transporter permease                                          |
| OG1RF_RS09745 | 0.30 | 0.0002  | ribosomal-protein-alanine N-acetyltransferase                     |
| OG1RF_RS05215 | 0.30 | 0.0060  | metallophosphoesterase                                            |

|               |      |         |                                                                                         |
|---------------|------|---------|-----------------------------------------------------------------------------------------|
| OG1RF_RS08330 | 0.30 | <0.0001 | triose-phosphate isomerase                                                              |
| OG1RF_RS06845 | 0.30 | 0.0006  | DUF2179 domain-containing protein                                                       |
| OG1RF_RS06980 | 0.29 | 0.0001  | ABC transporter ATP-binding protein                                                     |
| OG1RF_RS13090 | 0.29 | <0.0001 | tRNA uridine-5-carboxymethylaminomethyl(34) synthesis GTPase MnmE                       |
| OG1RF_RS02790 | 0.29 | 0.0001  | phosphatase PAP2 family protein                                                         |
| OG1RF_RS11990 | 0.29 | <0.0001 | 30S ribosomal protein S4                                                                |
| OG1RF_RS12025 | 0.29 | <0.0001 | DUF1054 domain-containing protein                                                       |
| OG1RF_RS01595 | 0.29 | 0.0009  | MarR family transcriptional regulator                                                   |
| OG1RF_RS08335 | 0.29 | <0.0001 | phosphoglycerate kinase                                                                 |
| OG1RF_RS06510 | 0.29 | 0.0001  | SMC-Scp complex subunit ScpB                                                            |
| OG1RF_RS10245 | 0.29 | 0.0029  | GtrA family protein                                                                     |
| OG1RF_RS06625 | 0.28 | <0.0001 | 3-dehydroquinate synthase                                                               |
| OG1RF_RS12785 | 0.28 | 0.0009  | 1%2C4-dihydroxy-2-naphthoate polyprenyltransferase                                      |
| OG1RF_RS00305 | 0.28 | 0.0047  | Holliday junction branch migration protein RuvA                                         |
| OG1RF_RS01425 | 0.28 | 0.0003  | HAD family phosphatase                                                                  |
| OG1RF_RS04625 | 0.28 | 0.0029  | hypothetical protein                                                                    |
| OG1RF_RS10390 | 0.28 | 0.0003  | QueT transporter family protein                                                         |
| OG1RF_RS03515 | 0.28 | 0.0003  | tRNA (adenosine(37)-N6)-threonylcarbamoyltransferase complex ATPase subunit type 1 TsaE |
| OG1RF_RS00525 | 0.28 | 0.0139  | ArsR family transcriptional regulator                                                   |
| OG1RF_RS07285 | 0.28 | 0.0001  | DNA-binding response regulator                                                          |
| OG1RF_RS03285 | 0.28 | 0.0036  | mevalonate kinase                                                                       |
| OG1RF_RS03330 | 0.28 | 0.0001  | transposase                                                                             |
| OG1RF_RS13190 | 0.28 | 0.0001  | ribonuclease P protein component                                                        |
| OG1RF_RS03410 | 0.28 | <0.0001 | amino acid permease                                                                     |
| OG1RF_RS12250 | 0.27 | <0.0001 | guanylate kinase                                                                        |
| OG1RF_RS02905 | 0.27 | <0.0001 | 16S rRNA pseudouridine(516) synthase                                                    |
| OG1RF_RS09860 | 0.27 | 0.0110  | branched-chain amino acid ABC transporter permease                                      |
| OG1RF_RS06370 | 0.27 | 0.0010  | transcription antiterminator BglG                                                       |
| OG1RF_RS02675 | 0.27 | <0.0001 | hypothetical protein                                                                    |
| OG1RF_RS08735 | 0.27 | 0.0134  | MerR family transcriptional regulator                                                   |
| OG1RF_RS11785 | 0.27 | <0.0001 | dicarboxylate/amino acid:cation symporter                                               |
| OG1RF_RS08025 | 0.27 | <0.0001 | 50S ribosomal protein L19                                                               |
| OG1RF_RS01580 | 0.27 | <0.0001 | DUF979 domain-containing protein                                                        |
| OG1RF_RS04935 | 0.26 | <0.0001 | UDP-N-acetylglucosamine 1-carboxyvinyltransferase                                       |
| OG1RF_RS10405 | 0.26 | 0.0001  | histidine phosphatase family protein                                                    |
| OG1RF_RS08560 | 0.25 | 0.0014  | TetR/AcrR family transcriptional regulator                                              |
| OG1RF_RS11895 | 0.25 | 0.0002  | peptidase C39 family protein                                                            |
| OG1RF_RS04620 | 0.25 | 0.0035  | hypothetical protein                                                                    |
| OG1RF_RS09240 | 0.25 | <0.0001 | pyridoxal phosphate-dependent aminotransferase                                          |
| OG1RF_RS06985 | 0.25 | 0.0002  | iron ABC transporter permease                                                           |
| OG1RF_RS08895 | 0.25 | 0.0004  | glycosyltransferase family 2 protein                                                    |
| OG1RF_RS00950 | 0.25 | <0.0001 | TIGR00730 family Rossmann fold protein                                                  |
| OG1RF_RS09530 | 0.25 | <0.0001 | guanine deaminase                                                                       |
| OG1RF_RS05520 | 0.25 | <0.0001 | tRNA pseudouridine(55) synthase TruB                                                    |
| OG1RF_RS06540 | 0.25 | <0.0001 | ATP-dependent DNA helicase RecQ                                                         |
| OG1RF_RS07715 | 0.25 | 0.0010  | peptide ABC transporter substrate-binding protein                                       |
| OG1RF_RS05055 | 0.25 | 0.0001  | permease                                                                                |
| OG1RF_RS10795 | 0.25 | 0.0002  | D-alanyl-lipoteichoic acid biosynthesis protein DltB                                    |
| OG1RF_RS09790 | 0.24 | <0.0001 | phosphatidate cytidylyltransferase                                                      |

|               |      |         |                                                          |
|---------------|------|---------|----------------------------------------------------------|
| OG1RF_RS09520 | 0.24 | <0.0001 | GMP reductase                                            |
| OG1RF_RS02920 | 0.24 | <0.0001 | uridine kinase                                           |
| OG1RF_RS03660 | 0.24 | 0.0003  | metallophosphoesterase                                   |
| OG1RF_RS06620 | 0.24 | 0.0004  | 3-deoxy-7-phosphoheptulonate synthase                    |
| OG1RF_RS09250 | 0.24 | <0.0001 | DNA polymerase III subunit epsilon                       |
| OG1RF_RS07105 | 0.24 | 0.0002  | conjugal transfer protein TraX                           |
| OG1RF_RS10690 | 0.24 | 0.0124  | MurR/RpiR family transcriptional regulator               |
| OG1RF_RS08000 | 0.23 | <0.0001 | DeoR/GlpR transcriptional regulator                      |
| OG1RF_RS03235 | 0.23 | <0.0001 | amino acid ABC transporter ATP-binding protein           |
| OG1RF_RS08340 | 0.23 | <0.0001 | type I glyceraldehyde-3-phosphate dehydrogenase          |
| OG1RF_RS12790 | 0.23 | 0.0002  | FAD:protein FMN transferase                              |
| OG1RF_RS10540 | 0.23 | 0.0005  | tRNA1(Val) (adenine(37)-N6)-methyltransferase            |
| OG1RF_RS10905 | 0.23 | 0.0001  | membrane protein                                         |
| OG1RF_RS13030 | 0.23 | <0.0001 | ribosomal RNA small subunit methyltransferase G          |
| OG1RF_RS00015 | 0.23 | <0.0001 | chromosomal replication initiator protein DnaA           |
| OG1RF_RS08915 | 0.22 | <0.0001 | flavodoxin                                               |
| OG1RF_RS10840 | 0.22 | <0.0001 | ABC transporter ATP-binding protein                      |
| OG1RF_RS09835 | 0.22 | 0.0012  | hypothetical protein                                     |
| OG1RF_RS11465 | 0.21 | 0.0001  | NCS2 family permease                                     |
| OG1RF_RS12085 | 0.21 | 0.0004  | cysteine hydrolase                                       |
| OG1RF_RS01210 | 0.21 | <0.0001 | PTS beta-glucoside transporter subunit EIIBCA            |
| OG1RF_RS08990 | 0.21 | 0.0001  | FUSC family protein                                      |
| OG1RF_RS12995 | 0.20 | <0.0001 | IMP dehydrogenase                                        |
| OG1RF_RS09385 | 0.20 | <0.0001 | 30S ribosomal protein S2                                 |
| OG1RF_RS03490 | 0.20 | 0.0001  | N-acetyltransferase                                      |
| OG1RF_RS13680 | 0.20 | <0.0001 | hypothetical protein                                     |
| OG1RF_RS11010 | 0.20 | <0.0001 | DUF805 domain-containing protein                         |
| OG1RF_RS02625 | 0.20 | <0.0001 | glutamine ABC transporter substrate-binding protein GlnH |
| OG1RF_RS09040 | 0.20 | 0.0084  | ABC transporter ATP-binding protein                      |
| OG1RF_RS03240 | 0.20 | <0.0001 | glutamate ABC transporter permease                       |
| OG1RF_RS10115 | 0.19 | <0.0001 | transcription antiterminator BglG                        |
| OG1RF_RS00190 | 0.19 | 0.0001  | glutamate 5-kinase                                       |
| OG1RF_RS08855 | 0.18 | <0.0001 | DUF2304 domain-containing protein                        |
| OG1RF_RS12030 | 0.18 | <0.0001 | N-acetyltransferase                                      |
| OG1RF_RS08480 | 0.18 | <0.0001 | amino acid permease                                      |
| OG1RF_RS08365 | 0.18 | <0.0001 | hydroxymethylpyrimidine/phosphomethylpyrimidine kinase   |
| OG1RF_RS02710 | 0.18 | 0.0059  | cold-shock protein                                       |
| OG1RF_RS11185 | 0.18 | <0.0001 | enoyl-[acyl-carrier-protein] reductase FabK              |
| OG1RF_RS00115 | 0.17 | <0.0001 | DUF956 domain-containing protein                         |
| OG1RF_RS08695 | 0.17 | <0.0001 | heme ABC transporter ATP-binding protein                 |
| OG1RF_RS04595 | 0.17 | 0.0005  | adhesin                                                  |
| OG1RF_RS00905 | 0.17 | <0.0001 | DUF819 domain-containing protein                         |
| OG1RF_RS10485 | 0.17 | <0.0001 | haloacid dehalogenase                                    |
| OG1RF_RS02640 | 0.17 | <0.0001 | hypothetical protein                                     |
| OG1RF_RS01980 | 0.16 | 0.0065  | Tyrosine--tRNA ligase 1                                  |
| OG1RF_RS06995 | 0.16 | <0.0001 | glycerol-3-phosphate acyltransferase                     |
| OG1RF_RS01575 | 0.16 | <0.0001 | DUF969 domain-containing protein                         |
| OG1RF_RS01790 | 0.16 | <0.0001 | peptidase M23                                            |
| OG1RF_RS11980 | 0.16 | <0.0001 | DNA alkylation repair protein                            |

|               |      |         |                                                                            |
|---------------|------|---------|----------------------------------------------------------------------------|
| OG1RF_RS09245 | 0.16 | <0.0001 | peptidase                                                                  |
| OG1RF_RS08850 | 0.15 | <0.0001 | hypothetical protein                                                       |
| OG1RF_RS00445 | 0.15 | 0.0001  | formate/nitrite transporter                                                |
| OG1RF_RS01050 | 0.15 | <0.0001 | redox-regulated molecular chaperone Hsp33                                  |
| OG1RF_RS08690 | 0.14 | <0.0001 | energy-coupling factor transporter transmembrane protein EcFT              |
| OG1RF_RS00965 | 0.14 | <0.0001 | hypothetical protein                                                       |
| OG1RF_RS12510 | 0.14 | 0.0008  | sigma-70 family RNA polymerase sigma factor                                |
| OG1RF_RS12060 | 0.14 | 0.0001  | iron ABC transporter permease                                              |
| OG1RF_RS02815 | 0.14 | 0.0009  | DUF3955 domain-containing protein                                          |
| OG1RF_RS02430 | 0.13 | <0.0001 | ClC family H(+)/Cl(-) exchange transporter                                 |
| OG1RF_RS11695 | 0.13 | <0.0001 | SulP family inorganic anion transporter                                    |
| OG1RF_RS03085 | 0.13 | <0.0001 | cation transporter                                                         |
| OG1RF_RS09525 | 0.13 | <0.0001 | purine permease                                                            |
| OG1RF_RS06615 | 0.12 | <0.0001 | shikimate dehydrogenase                                                    |
| OG1RF_RS07720 | 0.12 | 0.0003  | cupin domain-containing protein                                            |
| OG1RF_RS06075 | 0.12 | 0.0006  | DUF1294 domain-containing protein                                          |
| OG1RF_RS04590 | 0.11 | 0.0004  | DUF898 domain-containing protein                                           |
| OG1RF_RS08700 | 0.11 | <0.0001 | DUF3816 family protein                                                     |
| OG1RF_RS11140 | 0.11 | 0.0001  | YqeG family HAD IIIA-type phosphatase                                      |
| OG1RF_RS11985 | 0.10 | <0.0001 | formate/nitrite transporter                                                |
| OG1RF_RS02695 | 0.10 | 0.0131  | hypothetical protein                                                       |
| OG1RF_RS04000 | 0.10 | <0.0001 | NCS2 family permease                                                       |
| OG1RF_RS02425 | 0.09 | <0.0001 | DeoR/GlpR transcriptional regulator                                        |
| OG1RF_RS01985 | 0.09 | 0.0025  | tyrosine decarboxylase                                                     |
| OG1RF_RS12655 | 0.09 | <0.0001 | PTS mannose/fructose/sorbose/N-acetylgalactosamine transporter subunit IIC |
| OG1RF_RS00095 | 0.08 | 0.0001  | PTS fructose transporter subunit IIB                                       |
| OG1RF_RS01685 | 0.08 | 0.0002  | MFS transporter                                                            |
| OG1RF_RS01205 | 0.07 | <0.0001 | PRD domain-containing protein                                              |
| OG1RF_RS01590 | 0.07 | <0.0001 | Na <sup>+</sup> /H <sup>+</sup> antiporter NhaC                            |
| OG1RF_RS01680 | 0.07 | <0.0001 | DUF4811 domain-containing protein                                          |
| OG1RF_RS09200 | 0.07 | <0.0001 | purine permease                                                            |
| OG1RF_RS03405 | 0.06 | <0.0001 | glucose transporter GlcU                                                   |
| OG1RF_RS05175 | 0.06 | <0.0001 | amidohydrolase                                                             |
| OG1RF_RS02345 | 0.06 | 0.0117  | DUF3290 domain-containing protein                                          |
| OG1RF_RS01990 | 0.06 | 0.0005  | amino acid permease                                                        |
| OG1RF_RS12650 | 0.05 | <0.0001 | PTS mannose/fructose/sorbose transporter subunit IIB                       |
| OG1RF_RS00110 | 0.05 | <0.0001 | PTS mannose transporter subunit IID                                        |
| OG1RF_RS10305 | 0.05 | 0.0014  | glycine/betaine ABC transporter permease                                   |
| OG1RF_RS01995 | 0.05 | <0.0001 | Na <sup>+</sup> /H <sup>+</sup> antiporter NhaC                            |
| OG1RF_RS00100 | 0.05 | <0.0001 | PTS mannose transporter subunit IIB                                        |
| OG1RF_RS09205 | 0.05 | <0.0001 | xanthine phosphoribosyltransferase                                         |
| OG1RF_RS10300 | 0.04 | 0.0006  | glycine betaine/L-proline ABC transporter ATP-binding protein              |
| OG1RF_RS00400 | 0.04 | 0.0138  | MFS transporter                                                            |
| OG1RF_RS05170 | 0.04 | <0.0001 | adenine deaminase                                                          |
| OG1RF_RS12645 | 0.03 | <0.0001 | PTS mannose transporter subunit IIA                                        |
| OG1RF_RS00105 | 0.03 | <0.0001 | PTS mannose/fructose/sorbose transporter subunit IIC                       |
| OG1RF_RS02820 | 0.03 | <0.0001 | hypothetical protein                                                       |
| OG1RF_RS05165 | 0.03 | 0.0002  | ABC transporter substrate-binding protein                                  |
| OG1RF_RS02415 | 0.03 | <0.0001 | PTS fructose transporter subunit IIC                                       |

|               |      |         |                                               |
|---------------|------|---------|-----------------------------------------------|
| OG1RF_RS10110 | 0.03 | <0.0001 | PTS beta-glucoside transporter subunit EIIBCA |
| OG1RF_RS02420 | 0.02 | <0.0001 | 1-phosphofructokinase                         |
| OG1RF_RS05025 | 0.02 | <0.0001 | MIP family channel protein                    |
| OG1RF_RS05155 | 0.02 | 0.0001  | ABC transporter permease                      |
| OG1RF_RS05160 | 0.02 | 0.0001  | ABC transporter ATP-binding protein           |
| OG1RF_RS13565 | 0.02 | 0.0003  | hypothetical protein                          |

---

<sup>a</sup>The DEGs of RNA-sequencing were defined by change ratio  $\geq 2$  and  $p < 0.05$ .

<sup>b</sup>The  $p$ -values for the DEGs of RNA-sequencing.



**Table S3.** The reads and reference genome comparison statistics of RNA-sequencing.

| <b>Sample name</b>              | <b>EF16_1</b>     | <b>EF16_2</b>     | <b>EF16_3</b>    | <b>EF16-O2_1</b>  | <b>EF16-O2_2</b>  | <b>EF16-O2_3</b>  |
|---------------------------------|-------------------|-------------------|------------------|-------------------|-------------------|-------------------|
| <b>Total reads</b>              | 13298542          | 11193758          | 9321776          | 13840844          | 14227328          | 14246934          |
| <b>Total mapped<sup>a</sup></b> | 12769019 (96.02%) | 10842029 (96.86%) | 8998740 (96.53%) | 13101150 (94.66%) | 13447696 (94.52%) | 13661875 (95.89%) |
| <b>Multiple mapped</b>          | 230574 (1.73%)    | 157872 (1.41%)    | 134491 (1.44%)   | 167526 (1.21%)    | 254088 (1.79%)    | 241196 (1.69%)    |
| <b>Uniquely mapped</b>          | 12538445 (94.28%) | 10684157 (95.45%) | 8864249 (95.09%) | 12933624 (93.45%) | 13193608 (92.73%) | 13420679 (94.2%)  |
| <b>Unmapped</b>                 | 529523 (3.98%)    | 351729 (3.14%)    | 323036 (3.47%)   | 739694 (5.34%)    | 779632 (5.48%)    | 585059 (4.11%)    |

<sup>a</sup>Total mapped: Number of reads that can be mapped to the reference genome.

Multiple mapped: Number of reads with multiple alignment positions on the reference genome.

Uniquely mapped: Number of reads with unique alignment positions on the reference genome.

Unmapped: Number of reads that cannot be mapped to the reference genome.

**Table S4.** Transcriptional expression levels of six candidate genes in ten *E. faecalis* clinical isolates for transformation.

| Isolate  | qRT-PCR expression ratio (strain/ OG1RF) |         |         |         |         |         |
|----------|------------------------------------------|---------|---------|---------|---------|---------|
|          | RS00630                                  | RS02205 | RS06145 | RS06880 | RS11485 | RS12140 |
| EF16C105 | 3.69                                     | 0.86    | 0.56    | 0.83    | 2.12    | 0.20    |
| EF16C2   | 1.24                                     | 0.01    | 0.97    | 5.37    | 12.93   | 1.64    |
| EF16C283 | 2.29                                     | 0.88    | 6.52    | 1.92    | 6.02    | 0.29    |
| EF16C284 | 0.20                                     | 0.52    | 1.05    | 0.19    | 0.64    | 7.89    |
| EF16C286 | 0.29                                     | 3.74    | 0.76    | 0.28    | 1.50    | 2.02    |
| EF16C387 | 1.56                                     | 0.27    | 3.03    | 1.81    | 6.53    | 0.64    |
| EF16C39  | 1.94                                     | 0.54    | 1.16    | 1.06    | 3.44    | 1.48    |
| EF16C4   | 1.40                                     | 0.36    | 0.38    | 2.06    | 10.48   | 1.33    |
| EF16C40  | 1.75                                     | 1.29    | 2.76    | 2.27    | 11.10   | 2.24    |
| EF16C5   | 0.93                                     | 0.48    | 0.67    | 1.41    | 4.35    | 8.58    |

Relative expressions of six candidate genes in OMC-sensitive isolates were determined by qRT-PCR analysis. The housekeeping gene *recA* was used as the endogenous reference gene. The *E. faecalis* OG1RF strain was used as the reference strain (expression = 1.0).

**Table S5.** Transformation of six candidate genes in clinical *E. faecalis* isolates.

| <b>Candidate gene</b> | <b>Strain1</b> | <b>Strain 2</b> | <b>Strain 3</b> |
|-----------------------|----------------|-----------------|-----------------|
| RS00630               | EF16C2         | EF16C105        | EF16C284        |
| RS02205               | EF16C2         | EF16C105        | EF16C39         |
| RS06145               | EF16C2         | EF16C105        | EF16C283        |
| RS06880               | EF16C2         | EF16C105        | EF16C284        |
| RS11485               | EF16C2         | EF16C105        | EF16C39         |
| RS12140               | EF16C105       | EF16C39         | EF16C40         |

**Table S6.** Homology analysis of *E. faecalis* OG1RF\_RS00630 encoding protein (AEA92812.1).

| Strain                        | <i>E. faecalis</i> OG1RF AEA92812.1 |                 |             |                                                      |
|-------------------------------|-------------------------------------|-----------------|-------------|------------------------------------------------------|
|                               | GenBank ID                          | No. amino acids | Identical % | Description or predicted function                    |
| <i>E. faecalis</i> ATCC 29212 | AIL03342.1                          | 361             | 96.3        | Basic membrane family protein                        |
| <i>E. faecalis</i> 62         | ADX78833.1                          | 361             | 96.3        | Ribonucleoside ABC transporter family protein        |
| <i>E. faecalis</i> V583       | AAO80051.1                          | 361             | 96.3        | Basic membrane protein family                        |
| <i>E. faecalis</i> DENG1      | AHI39275.1                          | 361             | 96.3        | Basic membrane protein family                        |
| <i>E. faecium</i> 13          | EPH67717.1                          | 392             | 75.5        | Basic membrane protein                               |
| <i>E. faecium</i> 505         | EJY46432.1                          | 373             | 71.6        | Basic membrane protein                               |
| <i>E. casseliflavus</i>       | WP_016609144.1                      | 372             | 75.4        | BMP family ABC transporter substrate-binding protein |
| <i>E. canintestini</i>        | WP_071864055.1                      | 373             | 72.6        | BMP family ABC transporter substrate-binding protein |
| <i>S. aureus</i>              | SUL86877.1                          | 347             | 62.5        | Purine nucleoside receptor A                         |
| <i>S. pneumoniae</i>          | CCM08442.1                          | 350             | 60.9        | putative lipoprotein                                 |
| <i>S. agalactiae</i>          | WP_065736824.1                      | 349             | 62          | BMP family ABC transporter substrate-binding protein |
| <i>K. pneumoniae</i>          | WP_116290355.1                      | 88              | 16.3        | BMP family ABC transporter substrate-binding protein |
| <i>E. coli</i>                | WP_116834533.1                      | 112             | 17.9        | BMP family ABC transporter substrate-binding protein |
| <i>A. baumannii</i>           | RJN76617.1                          | 55              | 5.1         | 3-hydroxyacyl-CoA dehydrogenase                      |

**Table S7.** Primers used for TET-specific resistance genes amplification.

| <b>Target gene</b> | <b>Primer</b> | <b>Primer sequence (5'-3')</b> | <b>Amplicon size (bp)</b> | <b>Reference</b> |
|--------------------|---------------|--------------------------------|---------------------------|------------------|
| <i>tet(M)</i>      | tet(M)-F      | CAATACAATAGGAGCAAGC            | 974                       | This study       |
|                    | tet(M)-R      | CGAACAAGAGGAAAGCATAAG          |                           |                  |
| <i>tet(L)</i>      | tet(L)-F      | GTAACCAGCCAACTAATGAC           | 908                       | This study       |
|                    | tet(L)-R      | TTGGATCGATAGTAGCC              |                           |                  |
| <i>tet(K)</i>      | tet(K)-F      | TCGATAGGAACAGCAGTA             | 169                       | (1)              |
|                    | tet(K)-R      | CAGCAGATCCTACTCCTT             |                           |                  |
| <i>tet(S)</i>      | tet(S)-F      | TACCTCCATTTGGACCTCAC           | 1050                      | This study       |
|                    | tet(S)-R      | GAACGCCAGAGAGGTATT             |                           |                  |
| <i>tet(W)</i>      | tet(W)-F      | GAGAGCCTGCTATATGCCAGC          | 168                       | (1)              |
|                    | tet(W)-R      | GGGCGTATCCACAATGTTAAC          |                           |                  |
| <i>tet(O)</i>      | tet(O)-F      | AACTTAGGCATTCTGGCTCAC          | 515                       | (1)              |
|                    | tet(O)-R      | TCCCACTGTTCCATATCGTCA          |                           |                  |
| <i>tet(U)</i>      | tet(U)-F      | CAAAAGAAATCGATACGTGG           | 294                       | (2)              |
|                    | tet(U)-R      | CGTCTGCAGATTCCTTAAAAGTC        |                           |                  |

**Table S8.** Primers used for MLST determination in *E. faecalis*.

| Target                  | Primer | Primer sequence (5'-3')  | Amplicon size (bp) | Reference |
|-------------------------|--------|--------------------------|--------------------|-----------|
| <i>gdh</i> <sup>a</sup> | gdh-F  | GGCGCACTAAAAGATATGGT     | 530                | (3)       |
|                         | gdh-R  | CCAAGATTGGGCAACTTCGTCCCA |                    |           |
| <i>gyd</i>              | gyd-F  | CAAAGTCTTAG CTCCAATGGC   | 395                | (3)       |
|                         | gyd-R  | CATTCGTTGTCATACCAAGC     |                    |           |
| <i>pstS</i>             | pstS-F | CGGAACAGGACTTTCGC        | 583                | (3)       |
|                         | pstS-R | ATTTACATCACGTTCTACTTGC   |                    |           |
| <i>gki</i>              | gki-F  | GATTTTGTGGGAATTGGTATGG   | 438                | (3)       |
|                         | gki-R  | ACCATTAAGCAAAATGATCGC    |                    |           |
| <i>aroE</i>             | aroE-F | TGGAAAACCTTACGGAGACAGC   | 459                | (3)       |
|                         | aroE-R | GTCCTG TCCATTGTTCAAAGC   |                    |           |
| <i>xpt</i>              | xpt-F  | AAAATGATGGCCGTGTATTAGG,  | 456                | (3)       |
|                         | xpt-R  | AACGTCACCGTTCCTTCACTTA   |                    |           |
| <i>yqiL</i>             | yqiL-F | CAGCTTAAGTCAAG TAAGTGCCG | 436                | (3)       |
|                         | yqiL-R | GAATATCCCTTCTGCTTGTGCT   |                    |           |

<sup>a</sup>*Gdh*: glucose-6-phosphate dehydrogenase; *gyd*: glyceraldehyde-3-phosphate dehydrogenase; *pstS*: phosphate-ATP binding cassette transporter; *gki*: glucokinase; *aroE*: shikimate 5-dehydrogenase; *xpt*: xanthine phosphoribosyltransferase; *yqiL*: acetyl-CoA acetyltransferase.

**Table S9.** Primers used for amplification of 30S ribosomal subunits of *E. faecalis*.

| Target gene      | Primer | Primer sequence (5'-3')    | Amplicon size (bp) | Reference  |
|------------------|--------|----------------------------|--------------------|------------|
| RR1 <sup>a</sup> | RR1-F  | CCGGAGGATTAGGTATTGGGATTGA  | 2356               | This study |
|                  | RR1-R  | CTCAAAACTGAACAAAGTAAAGACG  |                    |            |
| RR2              | RR2-F  | CTGAACAAGTGGACACCCAA       | 2767               | This study |
|                  | RR2-R  | CTCAAAACTGAACAAAGTAAAGACG  |                    |            |
| RR3              | RR3-F  | CGAATAGAAATGCTTGGGAAC      | 2995               | This study |
|                  | RR3-R  | CTCAAAACTGAACAAAGTAAAGACG  |                    |            |
| RR4              | RR4-F  | GTAGCCCAAGAAGAAACC         | 2668               | This study |
|                  | RR4-R  | CTCAAAACTGAACAAAGTAAAGACG  |                    |            |
| S10              | S10-F  | GACACGCTCGGACGCTTTGCCATGA  | 1708               | This study |
|                  | S10-R  | AATTCCATTATGCAAGCAACCTCCTC |                    |            |

<sup>a</sup>RR1-RR4: four copies of 16S rRNA gene; S10: 30S ribosomal subunit protein S10 in *E. faecalis*.

**Table S10.** Primers for qRT-PCR in this study.

| <b>Primer</b> | <b>Primer sequence (5'-3')</b> | <b>Amplicon size (bp)</b> |
|---------------|--------------------------------|---------------------------|
| recA-F        | CGACTAATGTCTCAAGCACTAC         | 106                       |
| recA-R        | CGAACATCACGCCAACTT             |                           |
| RS12140-F     | ACACTAATCCACAACACAT            | 112                       |
| RS12140-R     | TACTCTTGCTCAACTCTTC            |                           |
| RS02205-F     | TCTCAATGAACAAGCGGTAA           | 102                       |
| RS02205-R     | GCCACGGTTAAGTTAGGAA            |                           |
| RS06145-F     | GCATCCAGATATTCAGGTA            | 195                       |
| RS06145-R     | TTAGGCACAATAAGAACAAG           |                           |
| RS11485-F     | TTGCCTTAGTGTTAATCAT            | 107                       |
| RS11485-R     | AACGGCTAATAGAAGAAC             |                           |
| RS06880-F     | GCATTAACAGAGATTCTCT            |                           |
| RS06880-R     | ATAATAACTTGACGACCTT            | 179                       |
| RS00630-F     | GTATTGGCTACTTGCTAA             |                           |
| RS00630-R     | GCTGCTTCATTATCTCTAA            | 136                       |
| RS11300-F     | CTTGTGGTAACGGTAATG             |                           |
| RS11300-R     | TAACGCTTCTTCTTGAAC             | 113                       |
| RS10660-F     | ACGAGCCAACAAATCATT             |                           |
| RS10660-R     | TCAACCACTTCATCAACAA            | 121                       |
| RS05865-F     | ATTACCGACAGGCAACTT             |                           |
| RS05865-R     | TTCCAGGTGCTAATAGATTCA          | 134                       |
| RS09080-F     | AGCAAGTTACGAGATGTA             |                           |
| RS09080-R     | GTTGATAGGCACCATATAC            | 200                       |
| RS12590-F     | GGCATCAACCTTGGCTGTA            |                           |
| RS12590-R     | GACTGGAATCAACGCAATCAC          | 95                        |
| RS00350-F     | CACCAGATAATGTCCAAT             |                           |
| RS00350-R     | AAGAGCATAATTCCTAGTAA           | 94                        |



**Table S11.** Primers used for construction of gene overexpression strains.

| Primer                                             | Sequence (5'-3')                        | Product length (bp) | Underline (enzyme site) |
|----------------------------------------------------|-----------------------------------------|---------------------|-------------------------|
| <b>Construction of the overexpression plasmids</b> |                                         |                     |                         |
| RS00630-F                                          | <u>CGCGGATCC</u> CTATTTTATGGAGGCTTTACAG | 1152                | BamHI                   |
| RS00630-R                                          | CCGCTCGAGGGGAACAATAATGAGCCCTTCT         |                     | XhoI                    |
| RS02205-F                                          | <u>TCCCCCGGG</u> AAGAAGTGAAAGATGCGGTGA  | 1003                | SmaI                    |
| RS02205-R                                          | CCGCTCGAGAAGTTTCAATCAGTGCTTGCA          |                     | XhoI                    |
| RS06145-F                                          | <u>CGCGGATCC</u> TGACTTGAGTTATGGCGGGTA  | 867                 | BamHI                   |
| RS06145-R                                          | CCGCTCGAGAAGAATTGGTCGAACATCCAT          |                     | XhoI                    |
| RS06880-F                                          | <u>CGCGGATCCC</u> CAAACCCCTTTACTCAGCGT  | 529                 | BamHI                   |
| RS06880-R                                          | CCGCTCGAGAGCTTCCGTTTCAGGACGCTC          |                     | XhoI                    |
| RS11485-F                                          | <u>CGCGGATCC</u> GTTGTCTTTTAAACGAGAGAG  | 962                 | BamHI                   |
| RS11485-R                                          | CCGCTCGAGAAAGTATTCAACGCCCTGAAT          |                     | XhoI                    |
| RS12140-F                                          | <u>CGCGGATCCC</u> CATGAAGTTGCACCGAATCAT | 1092                | BamHI                   |
| RS12140-R                                          | CCGCTCGAGATCACTTGCGGAATCATCAAT          |                     | XhoI                    |
| <b>Verification of the overexpression plasmids</b> |                                         |                     |                         |
| IDRS00630-F                                        | TTGACCGTGATCAAGATGCTG                   | 624                 |                         |
| IDRS00630-R                                        | AGACTGTAACATTCTCACGCA                   |                     |                         |
| IDRS02205-F                                        | AGTCGATACGCCAGAAGCCAT                   | 623                 |                         |
| IDRS02205-R                                        | GACTGTAACATTCTCACGCAT                   |                     |                         |
| IDRS06145-F                                        | AGCGAATGCAAGTGCAGAAGC                   | 559                 |                         |
| IDRS06145-R                                        | AGACTGTAACATTCTCACGCAT                  |                     |                         |
| IDRS06880-F                                        | TGCTTGCGGAAACGGTTTATG                   | 604                 |                         |
| IDRS06880-R                                        | ACTATTGCCGGGATAGACTGT                   |                     |                         |
| IDRS11485-F                                        | AGCAATAGGCATGGTAATTGT                   | 524                 |                         |
| IDRS11485-R                                        | ATGCGCCATGACAGCCATGAT                   |                     |                         |
| IDRS12140-F                                        | ATGTGTGACAACATTGCCATT                   | 628                 |                         |
| IDRS12140-R                                        | GACTGTAACATTCTCACGCAT                   |                     |                         |

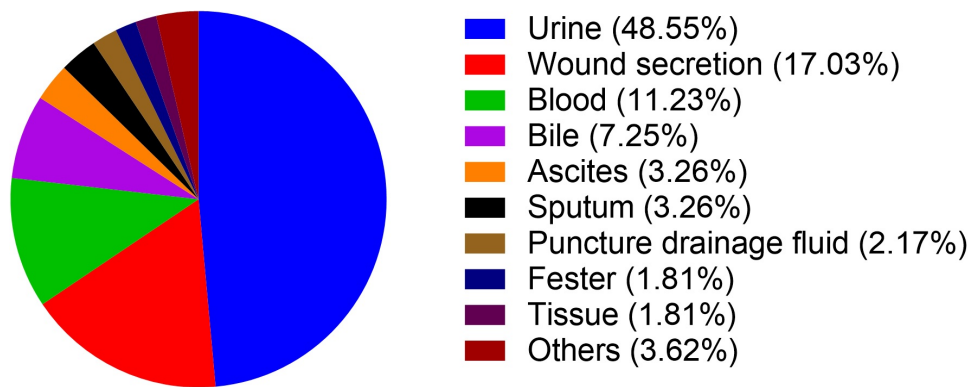

**Figure S1.** The original sources of 276 clinical *E. faecalis* isolates used in this study. Other sources included pleural effusion (3 strains), cerebrospinal fluid (2 strains), eye discharge (2 strains), vaginal discharge (2 strains), and amniotic fluid (1 strain).

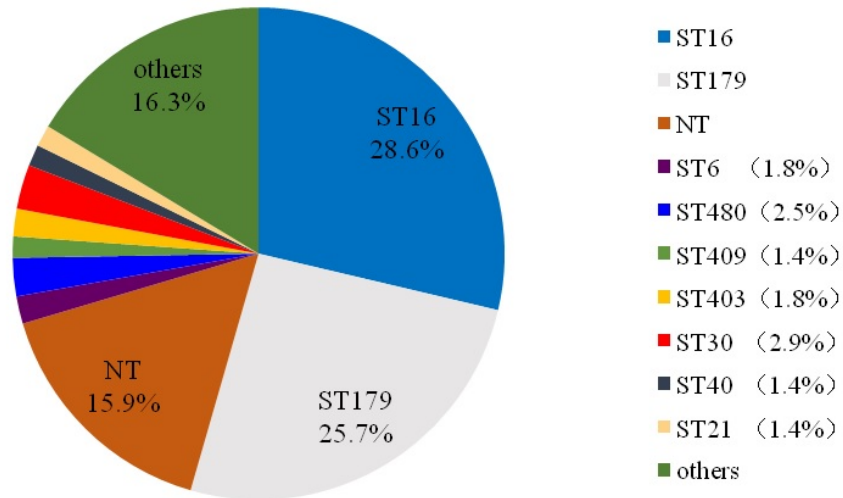

**Figure S2.** The distribution of multilocus sequence typing (MLST) among *E. faecalis*. Besides the number of STs described above, other MLST genotype included ST79 (1 strain), ST69 (1 strain), ST67 (1 strain), ST64 (1strain), ST63 (1 strain), ST585 (1 strain), ST581 (1 strain), ST541 (3 strains), ST506 (2 strains), ST483 (1 strain), ST474 (1 strain), ST47 (2 strains), ST436 (1 strain), ST410 (1 strain), ST41 (2 strains), ST4 (3 strains), ST387 (3 strains), ST34 (1 strain), ST314 (2 strains), ST300 (1 strain), ST28 (2 strains), ST22 (1 strain), ST207 (1strain), ST202 (1 strain), ST193 (3 strains), ST191 (1 strain), ST143 (1 strain), ST139 (1 strain), ST126 (1 strain), ST116 (1 strain), ST11 (1 strain), ST100 (1 strain). NT: not typeable.

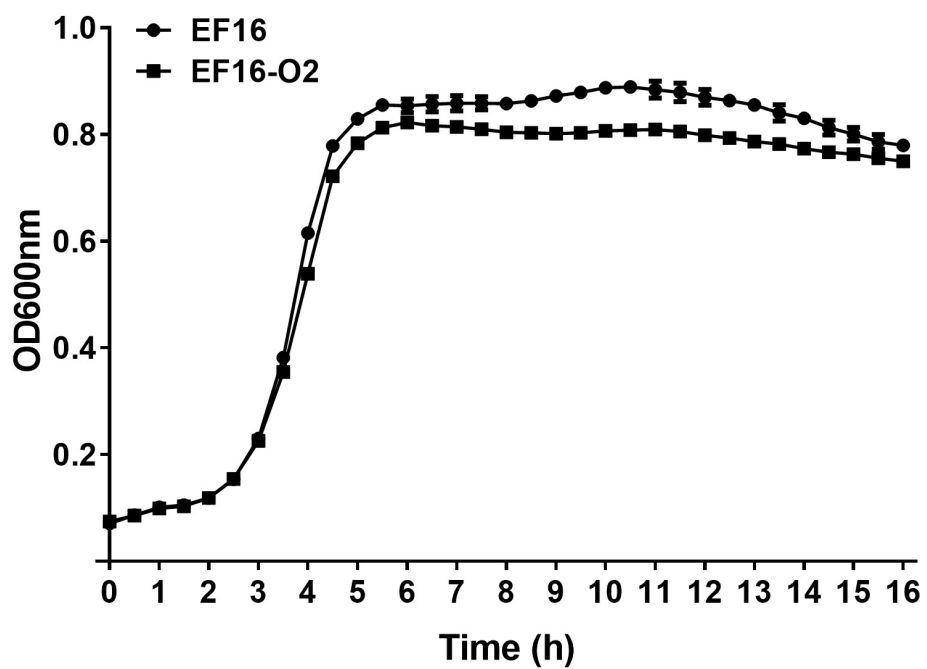

**Figure S3.** Growth curves of EF16C185 (EF16) and EF16C185-RS (EF16-O2) strains. Overnight bacterial cultures of EF16 or EF16-O2 were 1:200 diluted into MHB or MHB containing 1 mg/L OMC separately and incubated at 37°C with shaking at 220 rpm. The OD600 was measured every 30 min. Values are means  $\pm$  standard deviations from 3 independent wells.

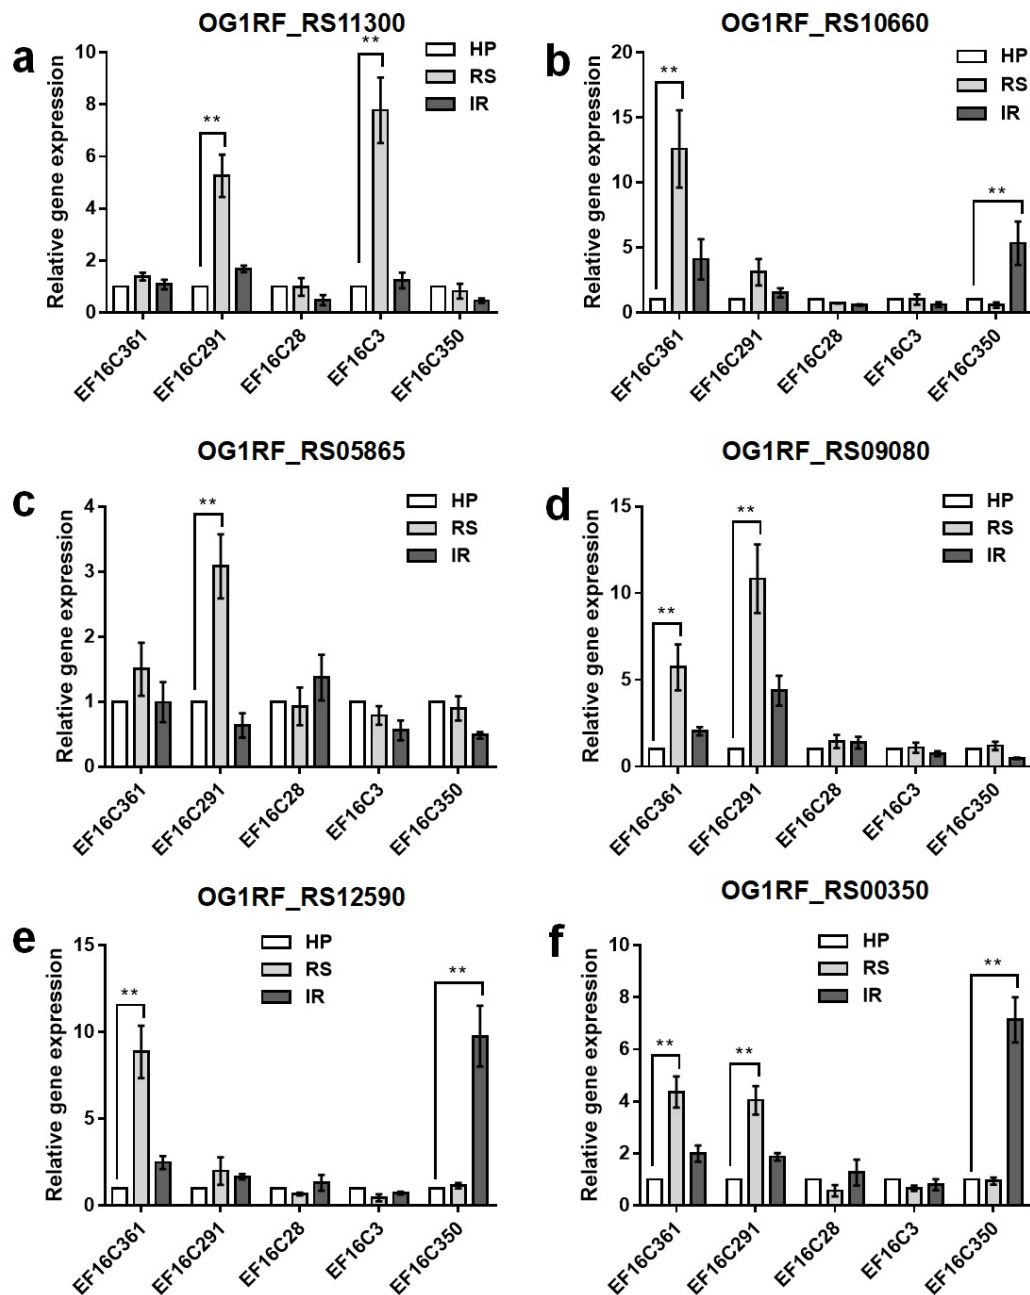

**Figure S4.** Comparison of the relative transcriptional analysis of six DEGs not used in overexpression experiments by qRT-PCR. Relative expressions of OG1RF\_RS11300 (a), OG1RF\_RS10660 (b), OG1RF\_RS05865 (c), OG1RF\_RS09080 (d), OG1RF\_RS12590 (e), and OG1RF\_RS00350 (f) were determined by qRT-PCR analysis. The housekeeping gene *recA* was used as the endogenous reference gene. The heteroresistant parental strain was used as the reference strain (expression = 1.0). All qRT-PCRs were carried out in triplicate with three independent RNA samples. HP: OMC heteroresistant parental strain; RS: OMC resistant subpopulations; IR, OMC-induced resistant strains. \*\*:  $p < 0.01$

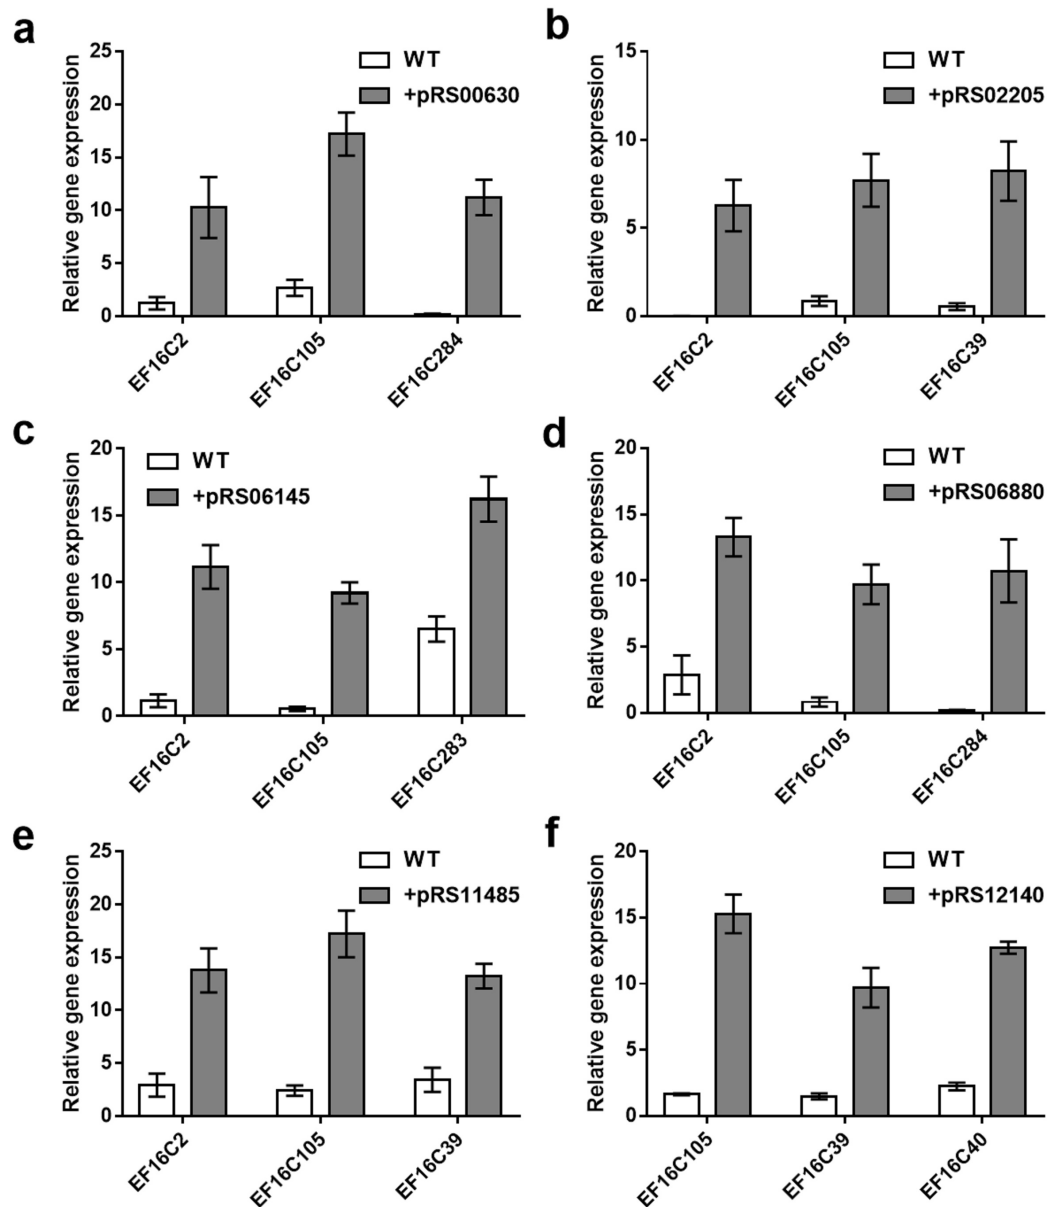

**Figure S5.** Relative transcriptional analysis of six candidate genes in different OMC-sensitive *E. faecalis* isolates and their corresponding transformed derivatives. The expression levels of OG1RF\_RS00630 (a), OG1RF\_RS02205 (b), OG1RF\_RS06145 (c), OG1RF\_RS06880 (d), OG1RF\_RS11485 (e), and OG1RF\_RS12140 (f) were determined by qRT-PCR. The housekeeping gene *recA* was used as the endogenous reference gene. The *E. faecalis* OG1RF strain was used as the reference strain (expression = 1.0). All qRT-PCRs were carried out in triplicate with three independent RNA samples.

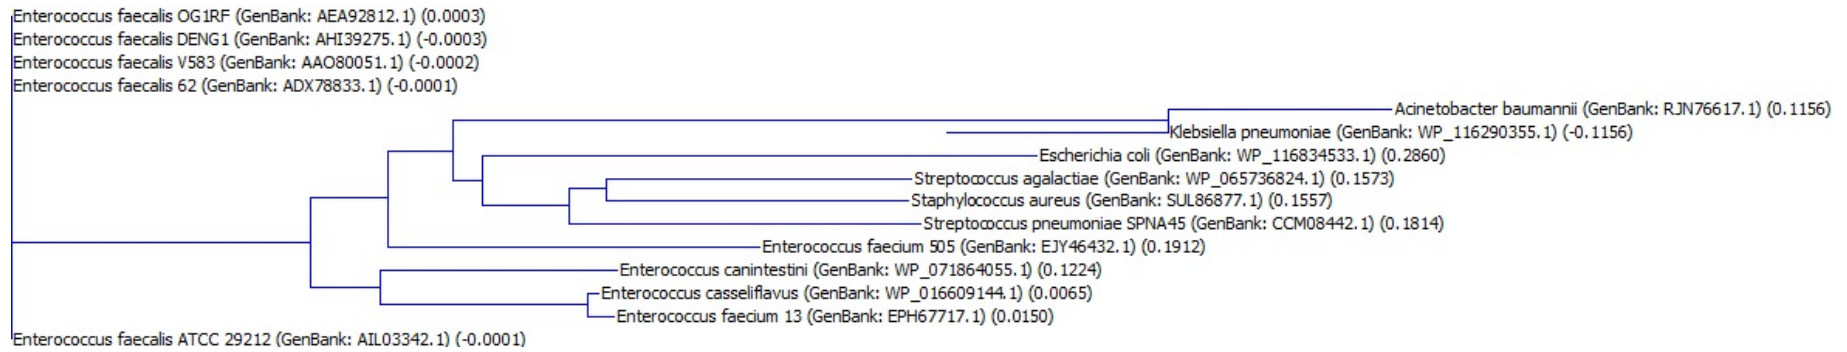

**Figure S6.** The phylogenetic tree of the BMP family ABC transporter substrate-binding protein encoded by OG1RF\_RS00630.

## References

1. Collins JR, Arredondo A, Roa A, Valdez Y, Leon R, Blanc V. 2016. Periodontal pathogens and tetracycline resistance genes in subgingival biofilm of periodontally healthy and diseased Dominican adults. *Clin Oral Investig* 20:349-56.
2. Nishimoto Y, Kobayashi N, Alam MM, Ishino M, Uehara N, Watanabe N. 2005. Analysis of the prevalence of tetracycline resistance genes in clinical isolates of *Enterococcus faecalis* and *Enterococcus faecium* in a Japanese hospital. *Microb Drug Resist* 11:146-53.
3. Ruiz-Garbajosa P, Bonten MJ, Robinson DA, Top J, Nallapareddy SR, Torres C, Coque TM, Canton R, Baquero F, Murray BE, del Campo R, Willems RJ. 2006. Multilocus sequence typing scheme for *Enterococcus faecalis* reveals hospital-adapted genetic complexes in a background of high rates of recombination. *J Clin Microbiol* 44:2220-8.
